# Supplementary material for: Synthesis and vitamin D receptor affinity of 16-oxa vitamin D3analogues
Source: Royal Society of Chemistry journal article supplement (doi:10.1039/c9ob02339a), 2019-01-01

<sup>1</sup>H NMR (CDCl<sub>3</sub>, 600 MHz)

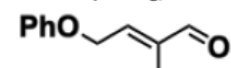

12

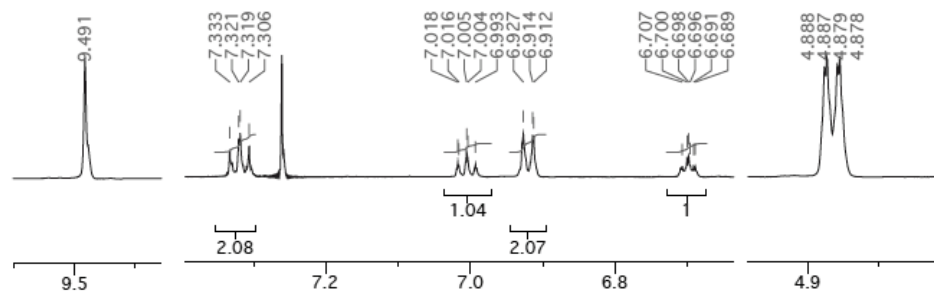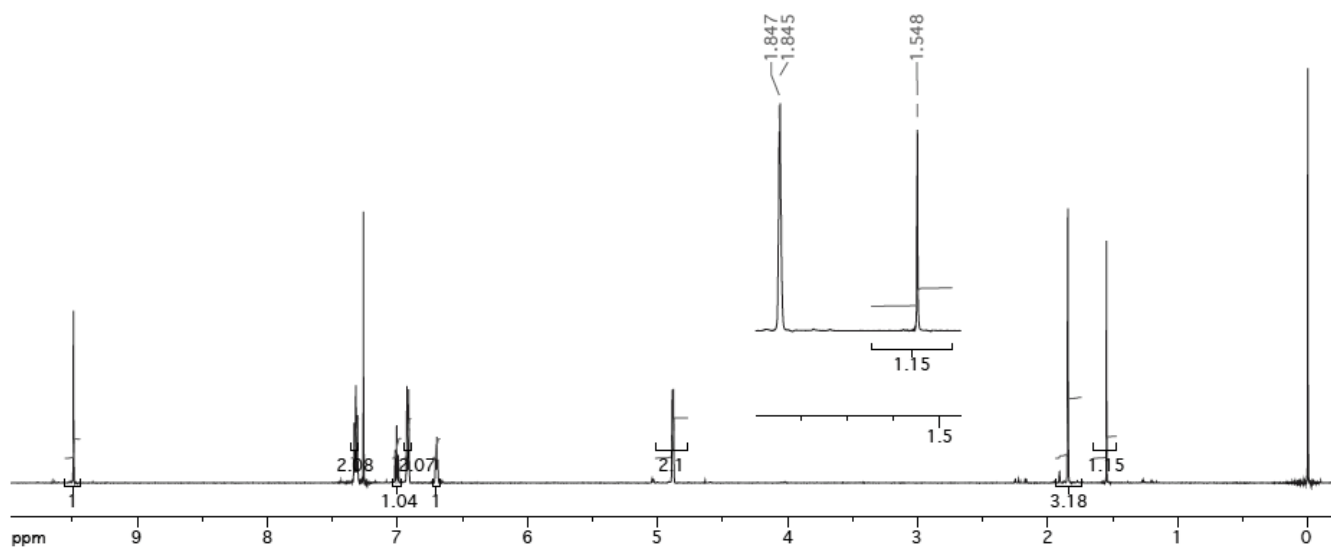

<sup>13</sup>C NMR (CDCl<sub>3</sub>, 150 MHz)

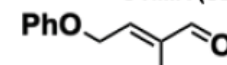

12

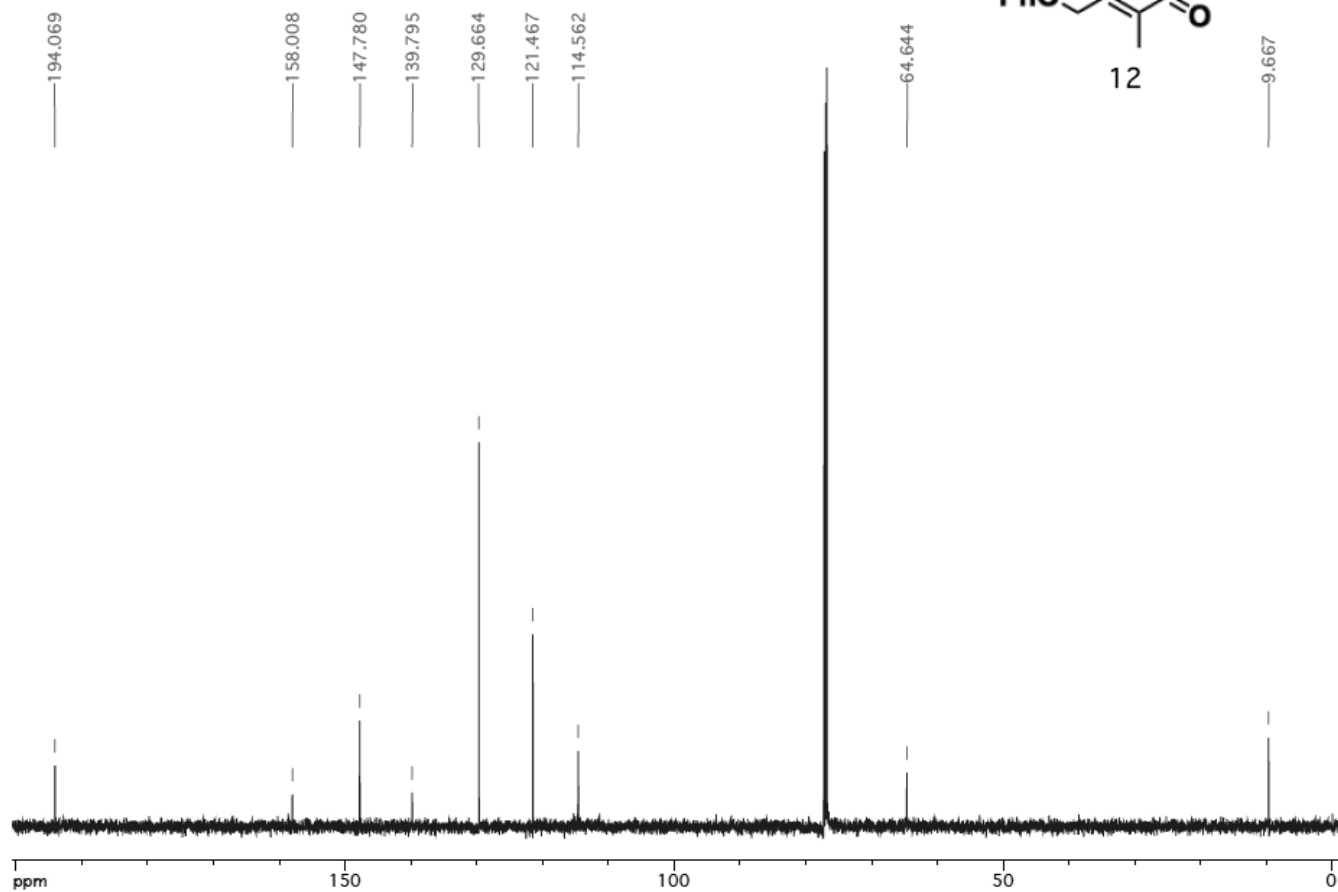

<sup>1</sup>H NMR (CDCl<sub>3</sub>, 600 MHz)

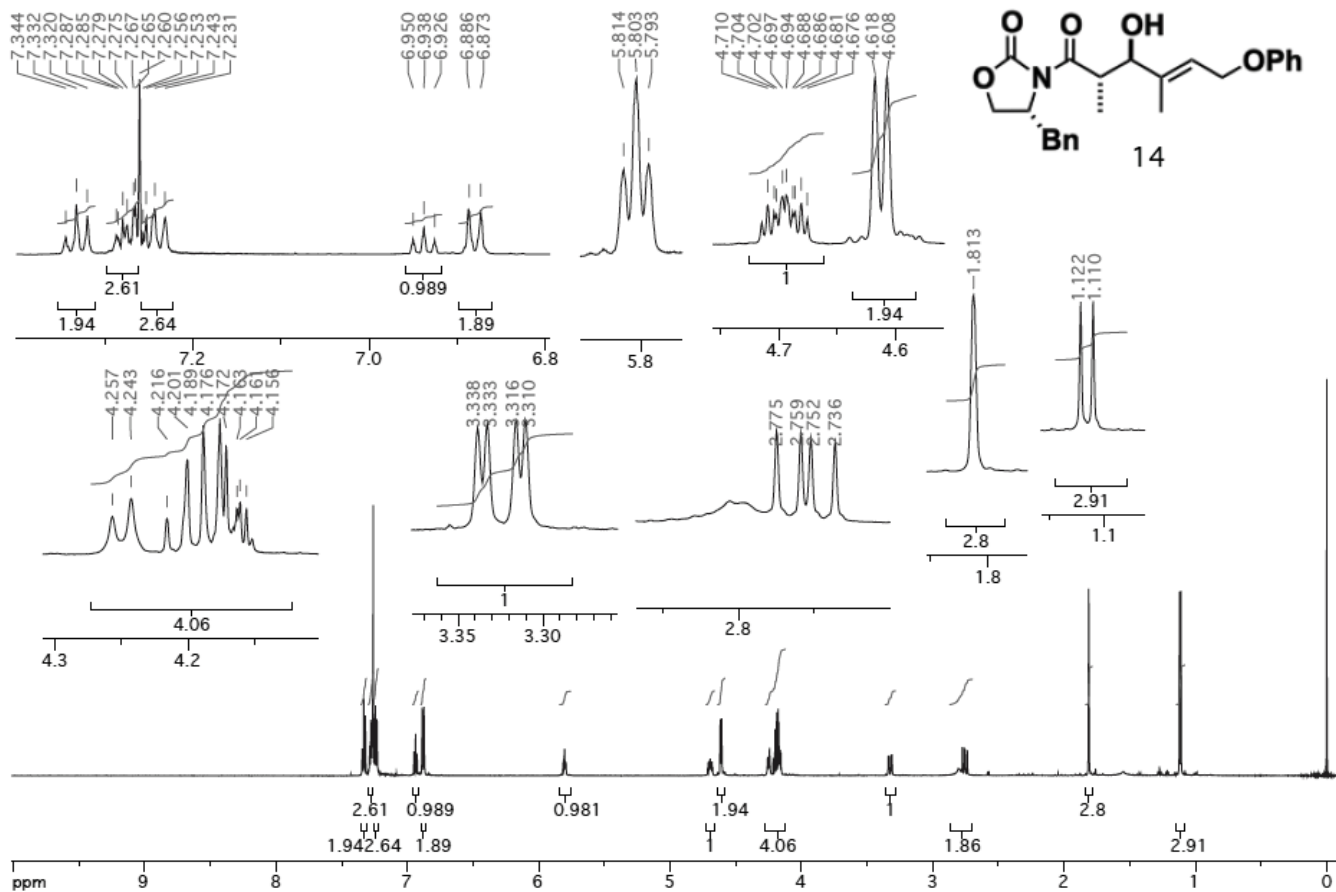

<sup>13</sup>C NMR (CDCl<sub>3</sub>, 150 MHz)

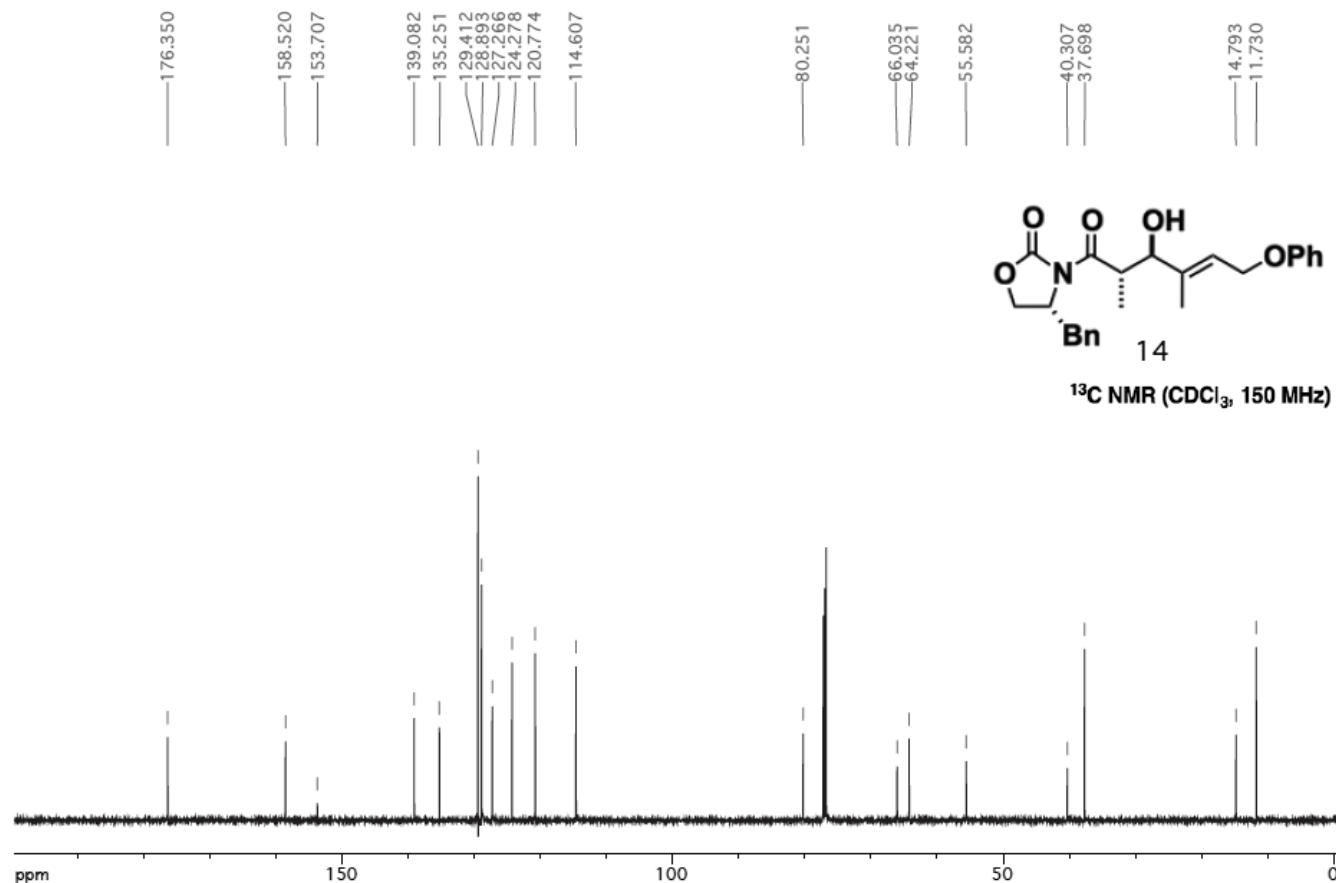

<sup>1</sup>H NMR (CDCl<sub>3</sub>, 600 MHz)

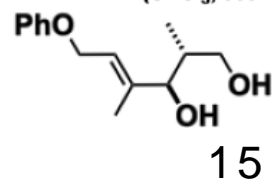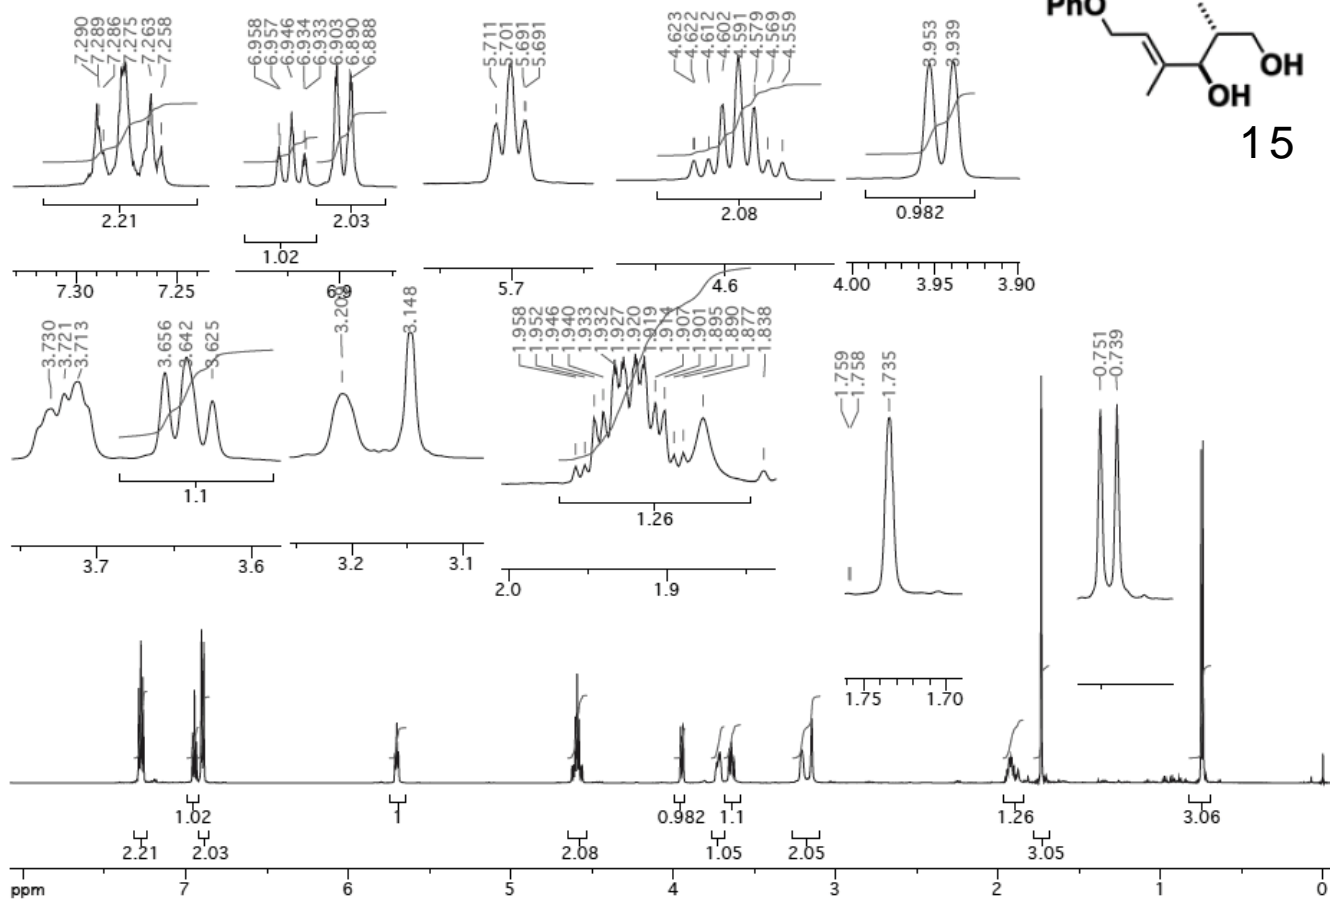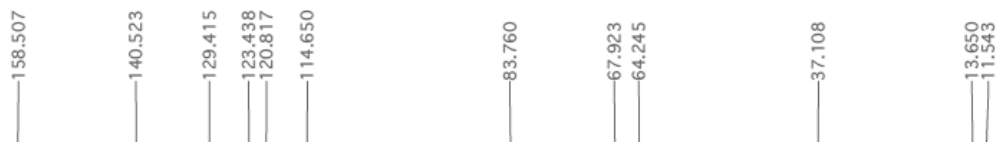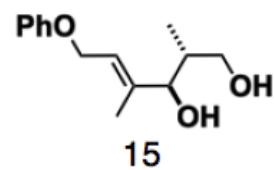

<sup>13</sup>C NMR (CDCl<sub>3</sub>, 150 MHz)

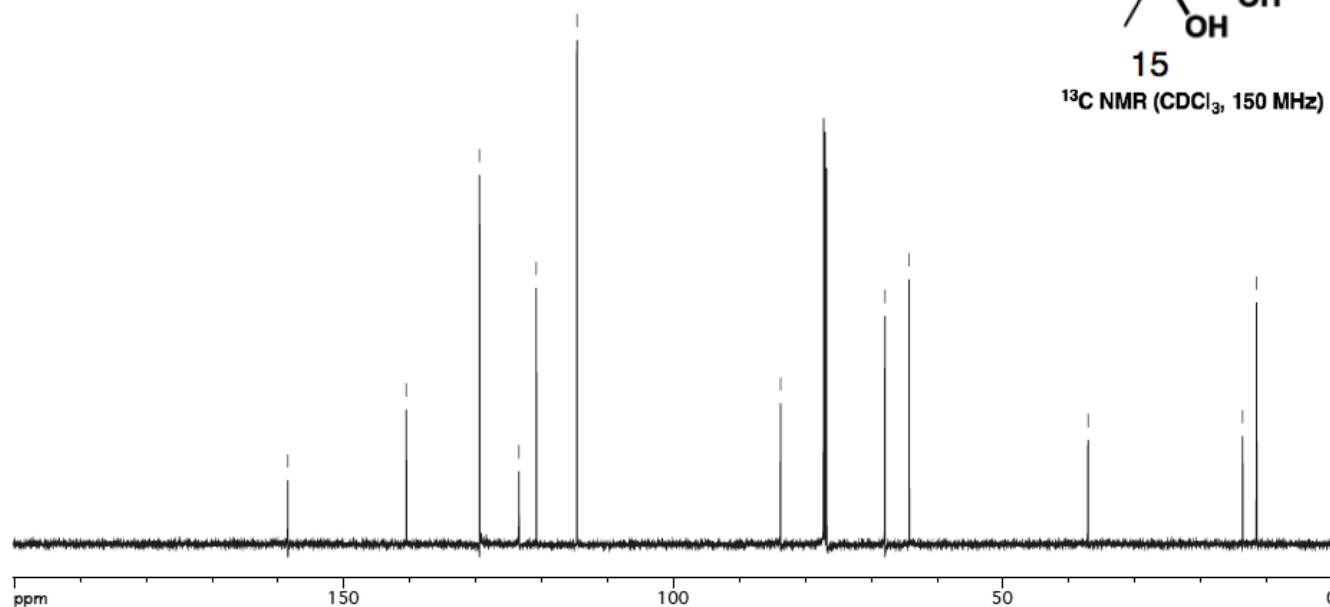

<sup>1</sup>H NMR (CDCl<sub>3</sub>, 600 MHz)

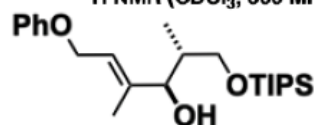

16

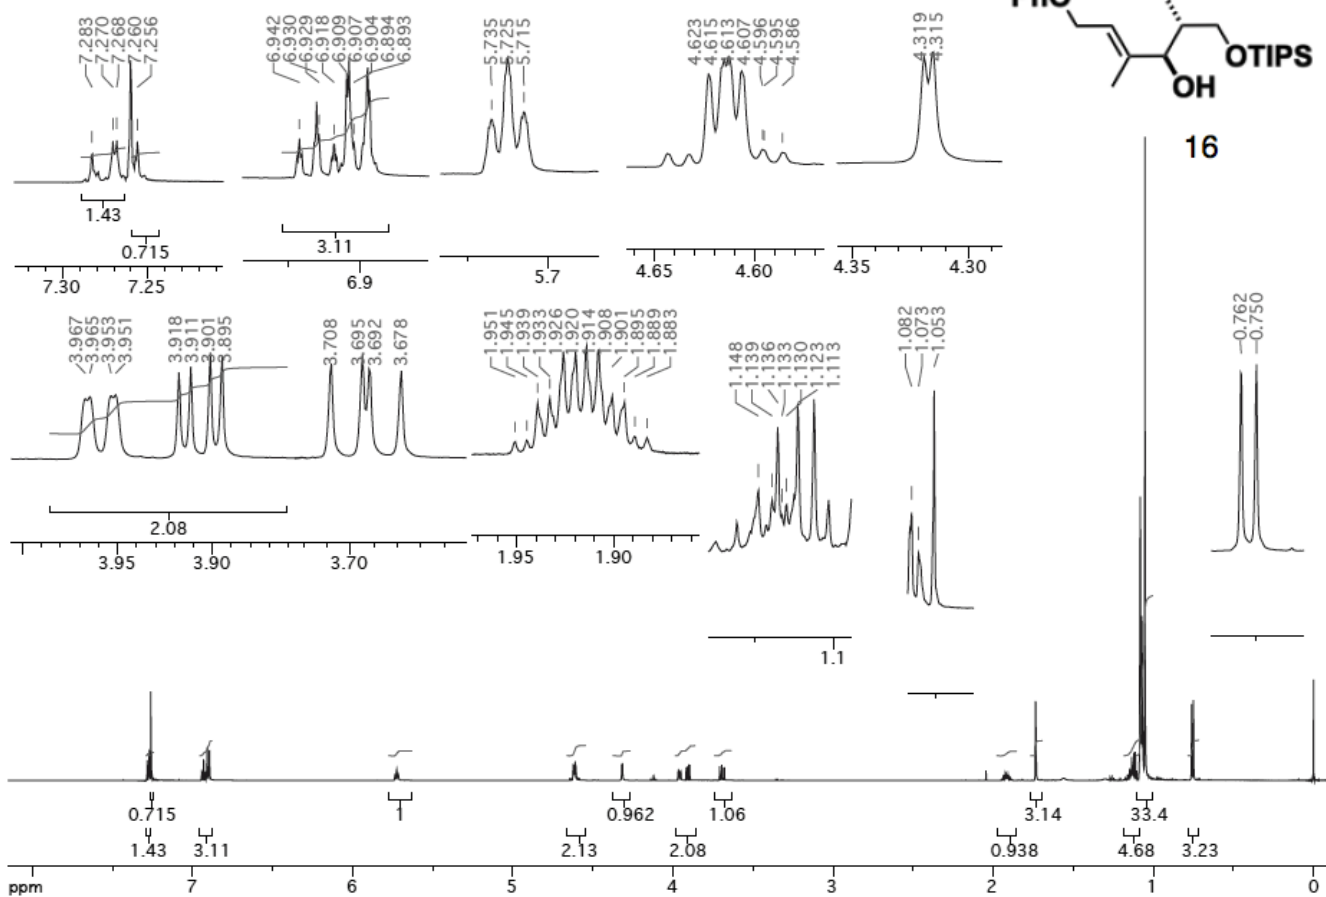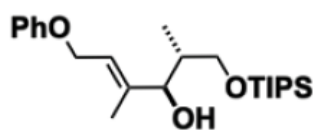

16

<sup>13</sup>C NMR (CDCl<sub>3</sub>, 150 MHz)

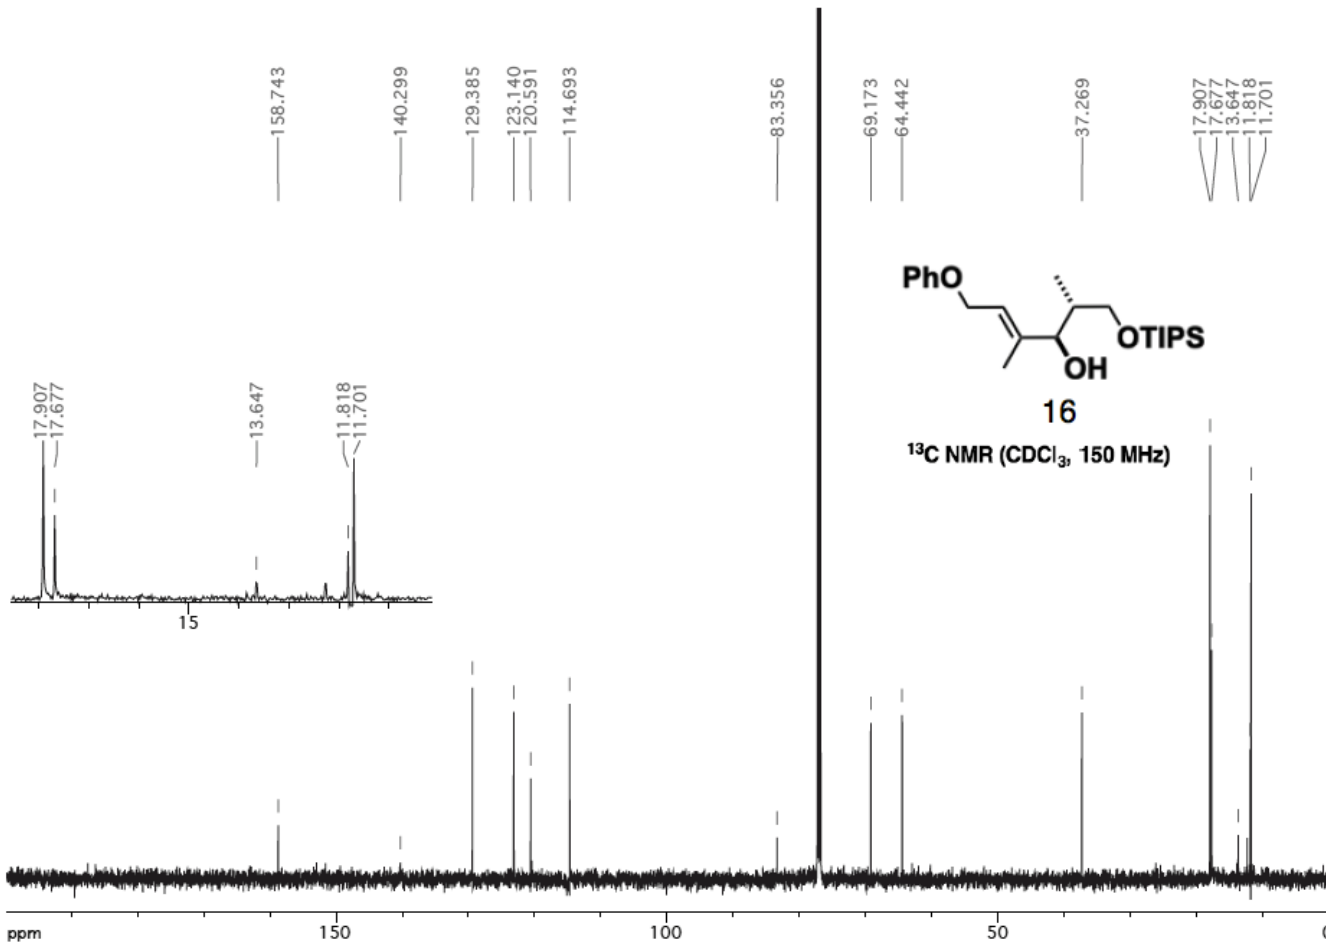

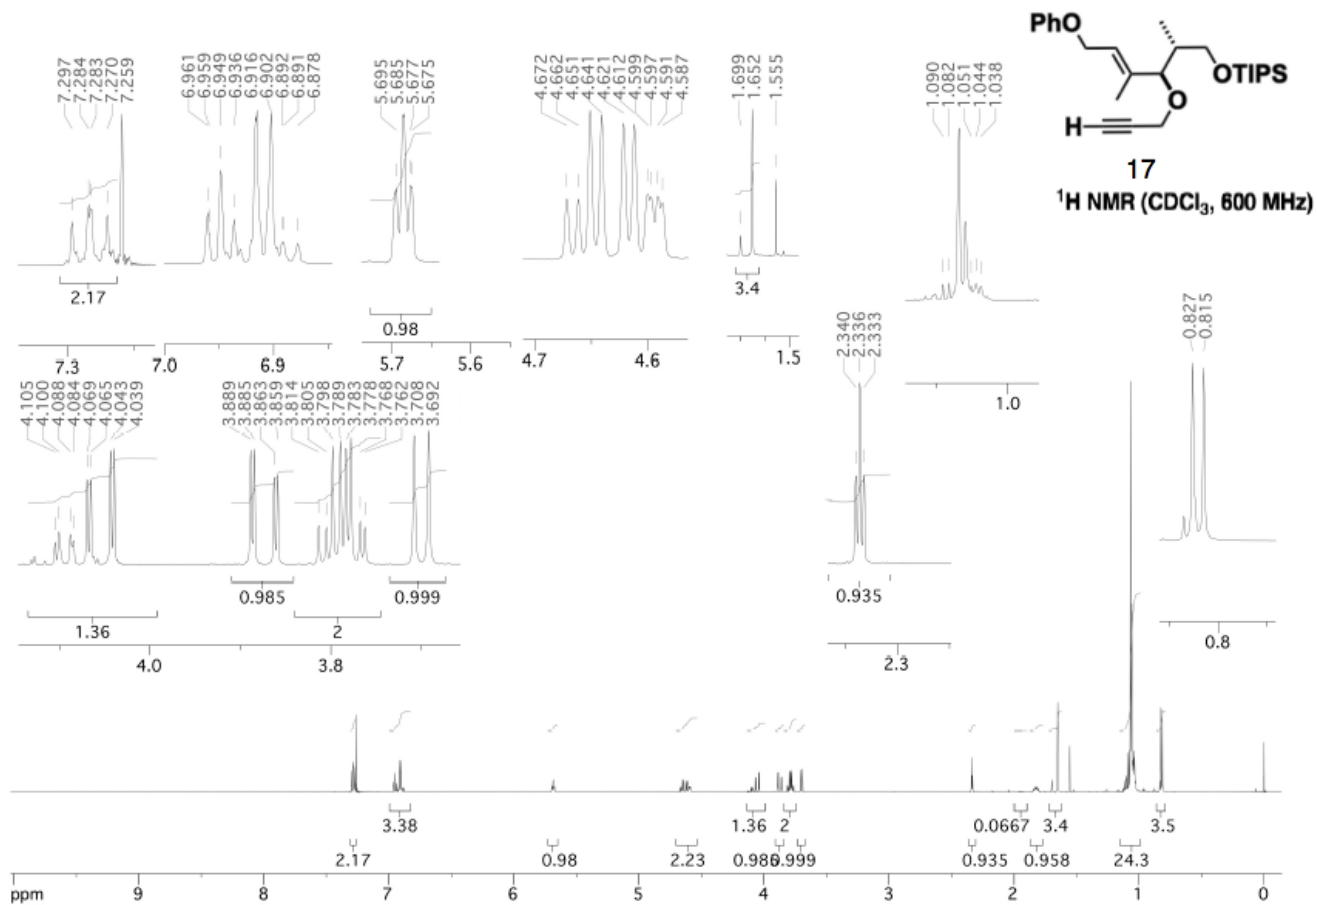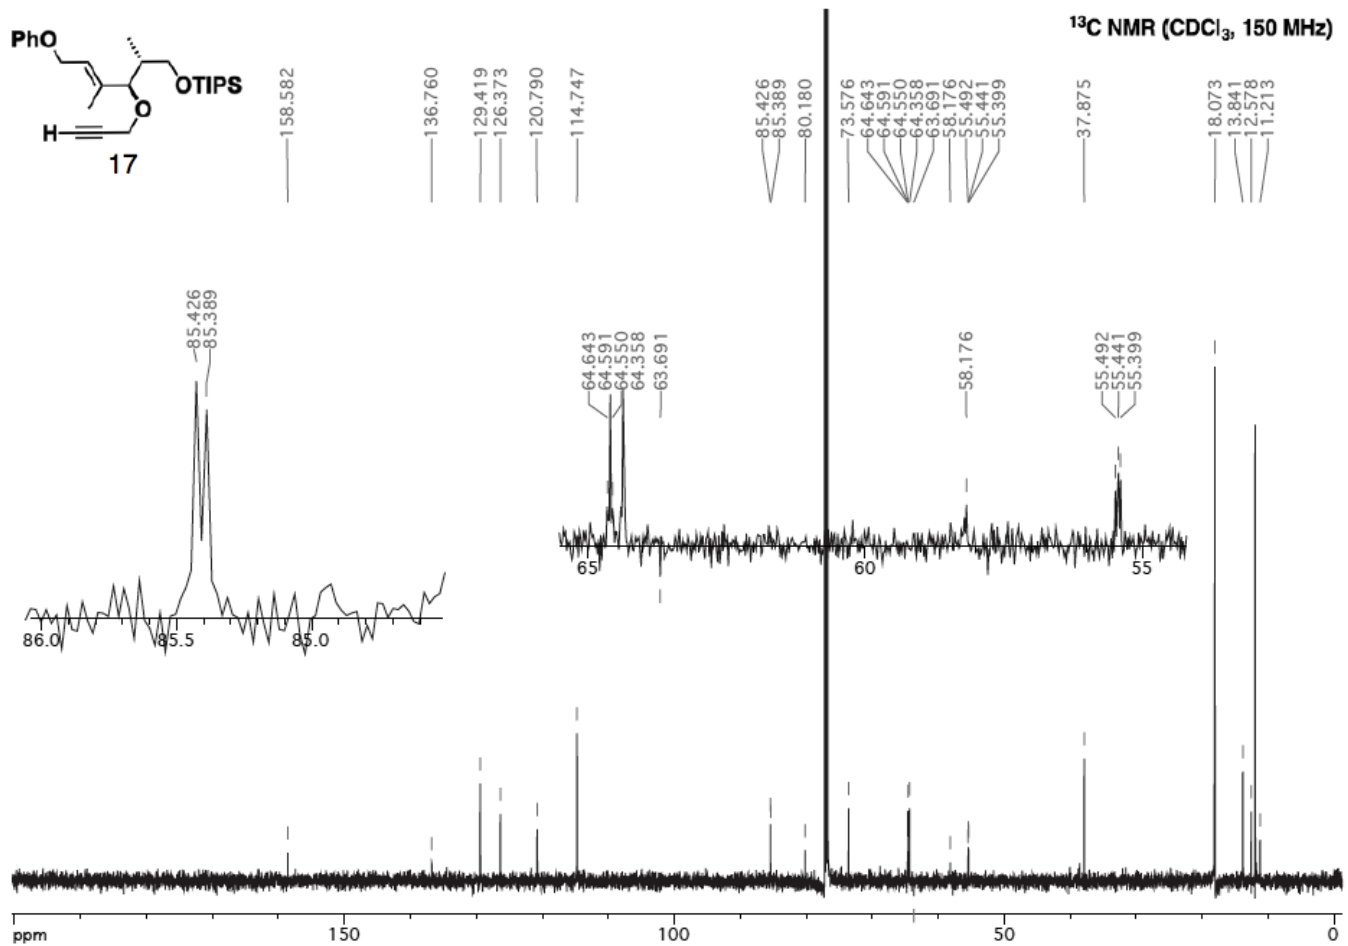

<sup>1</sup>H NMR (CDCl<sub>3</sub>, 600 MHz)

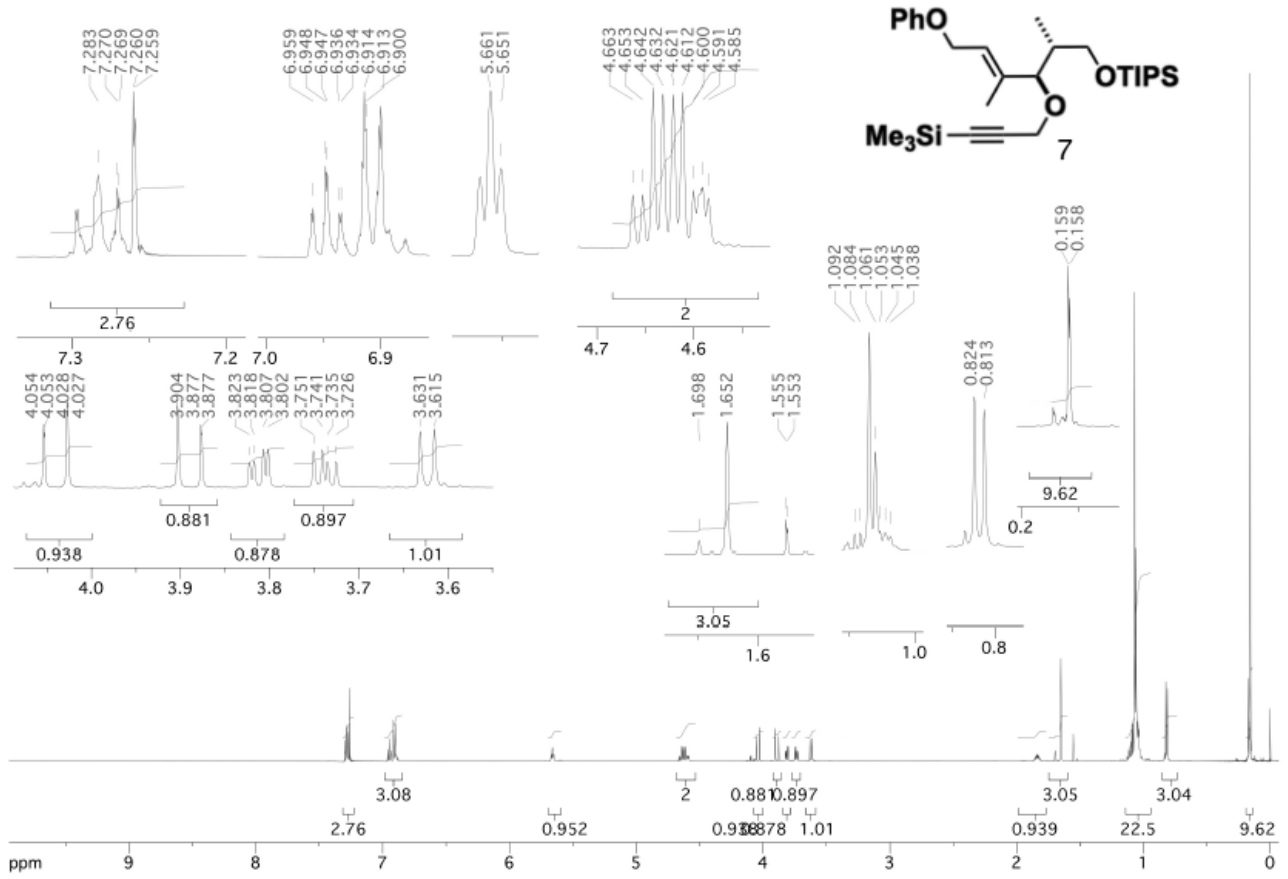

<sup>13</sup>C NMR (CDCl<sub>3</sub>, 150 MHz)

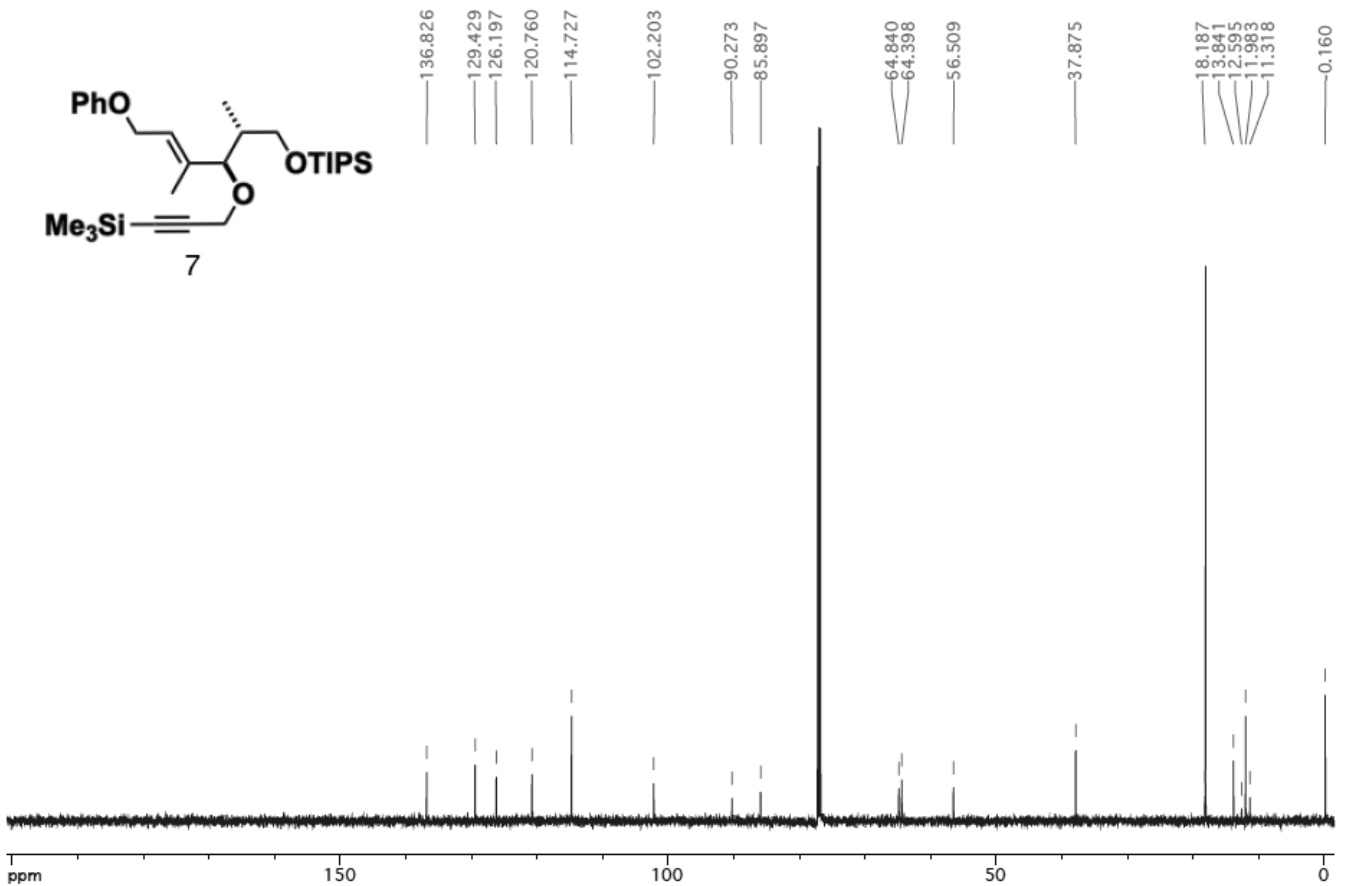

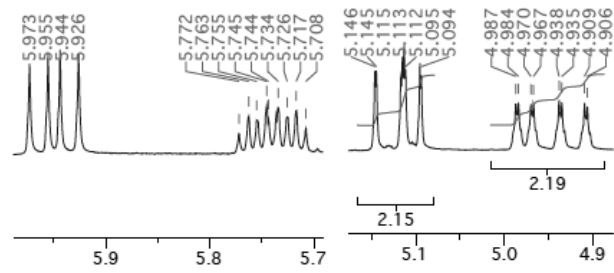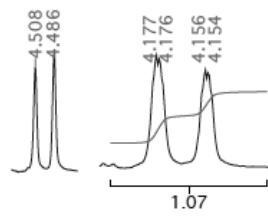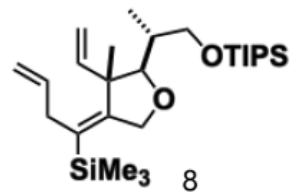

<sup>1</sup>H NMR (CDCl<sub>3</sub>, 600 MHz)

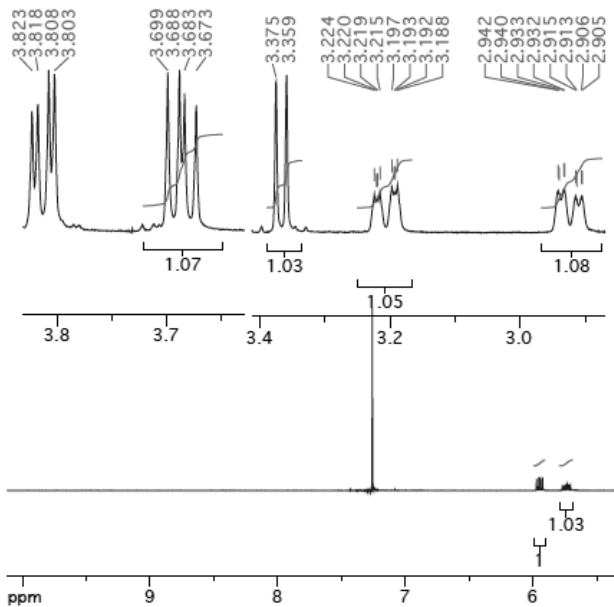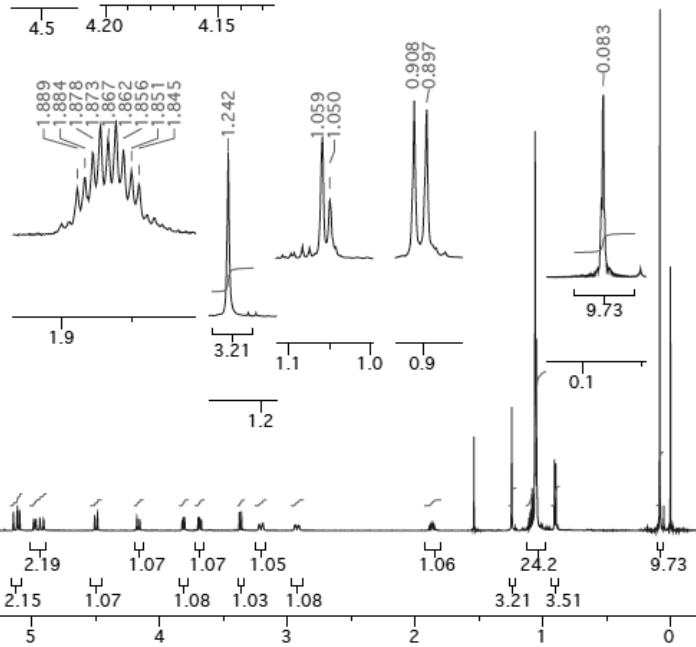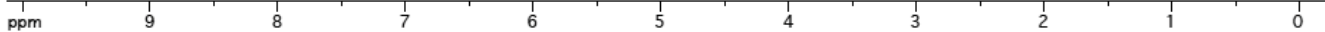

<sup>13</sup>C NMR (CDCl<sub>3</sub>, 150 MHz)

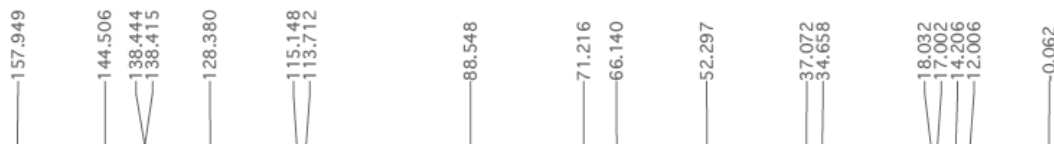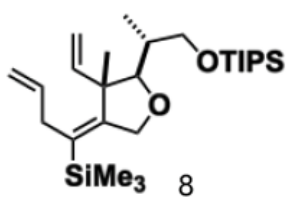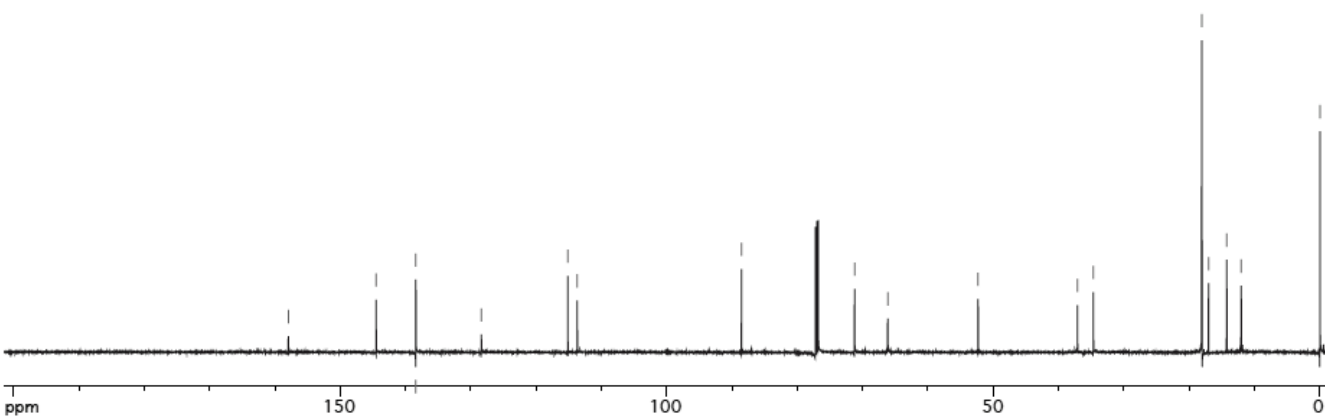

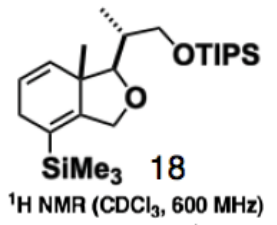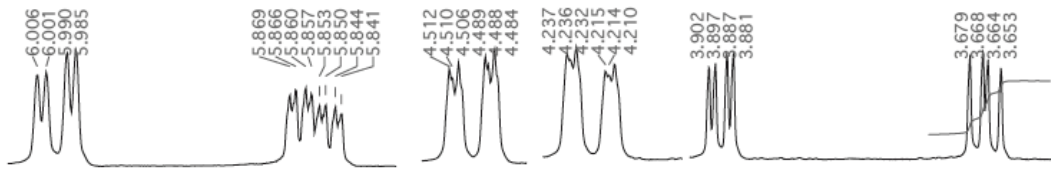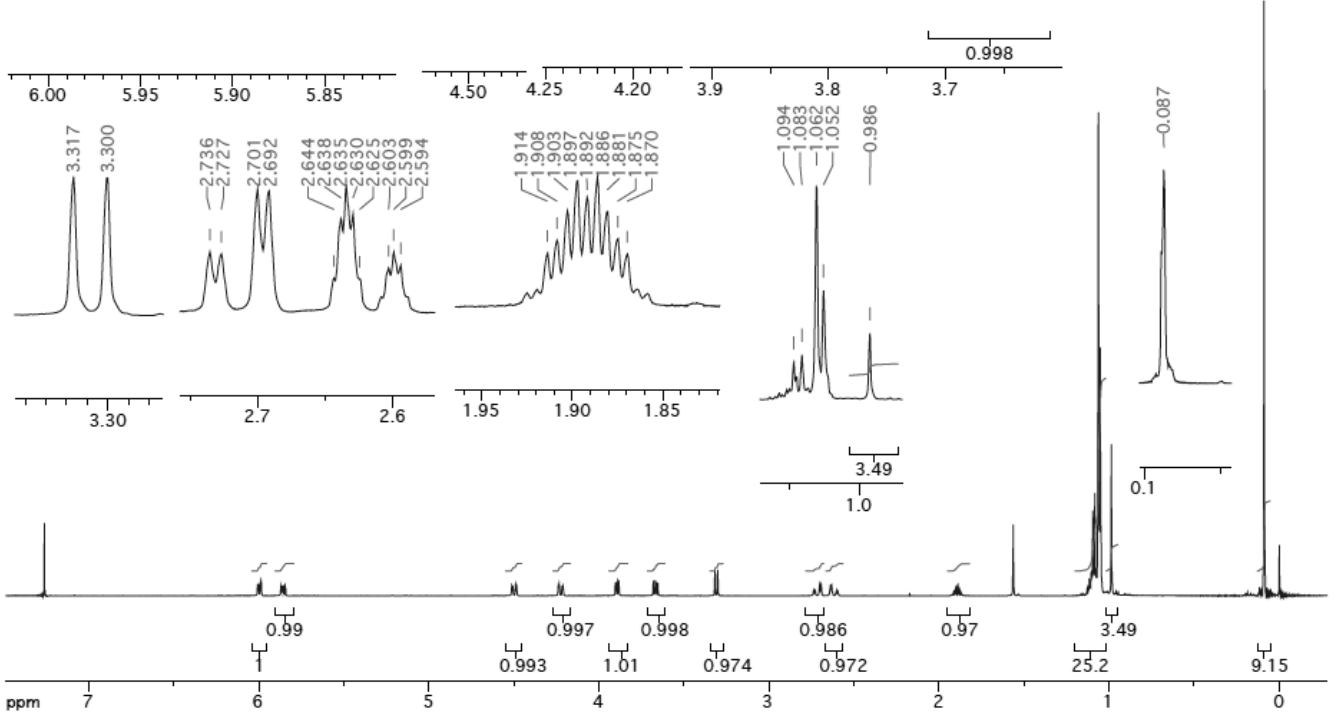

**<sup>13</sup>C NMR (CDCl<sub>3</sub>, 150 MHz)**

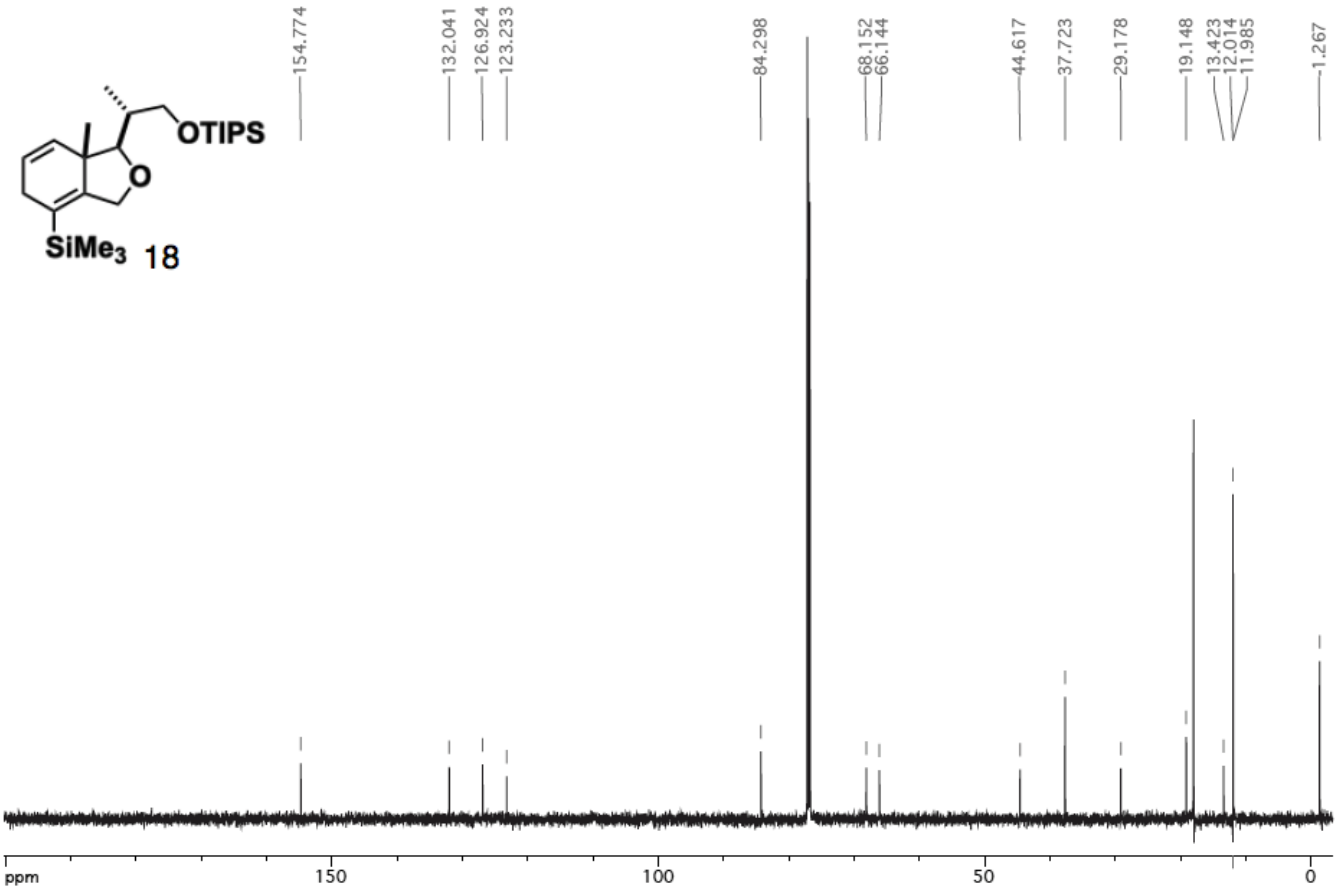



<sup>1</sup>H NMR (CDCl<sub>3</sub>, 600 MHz)

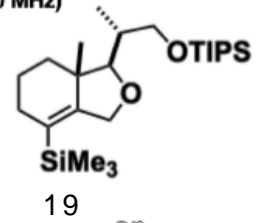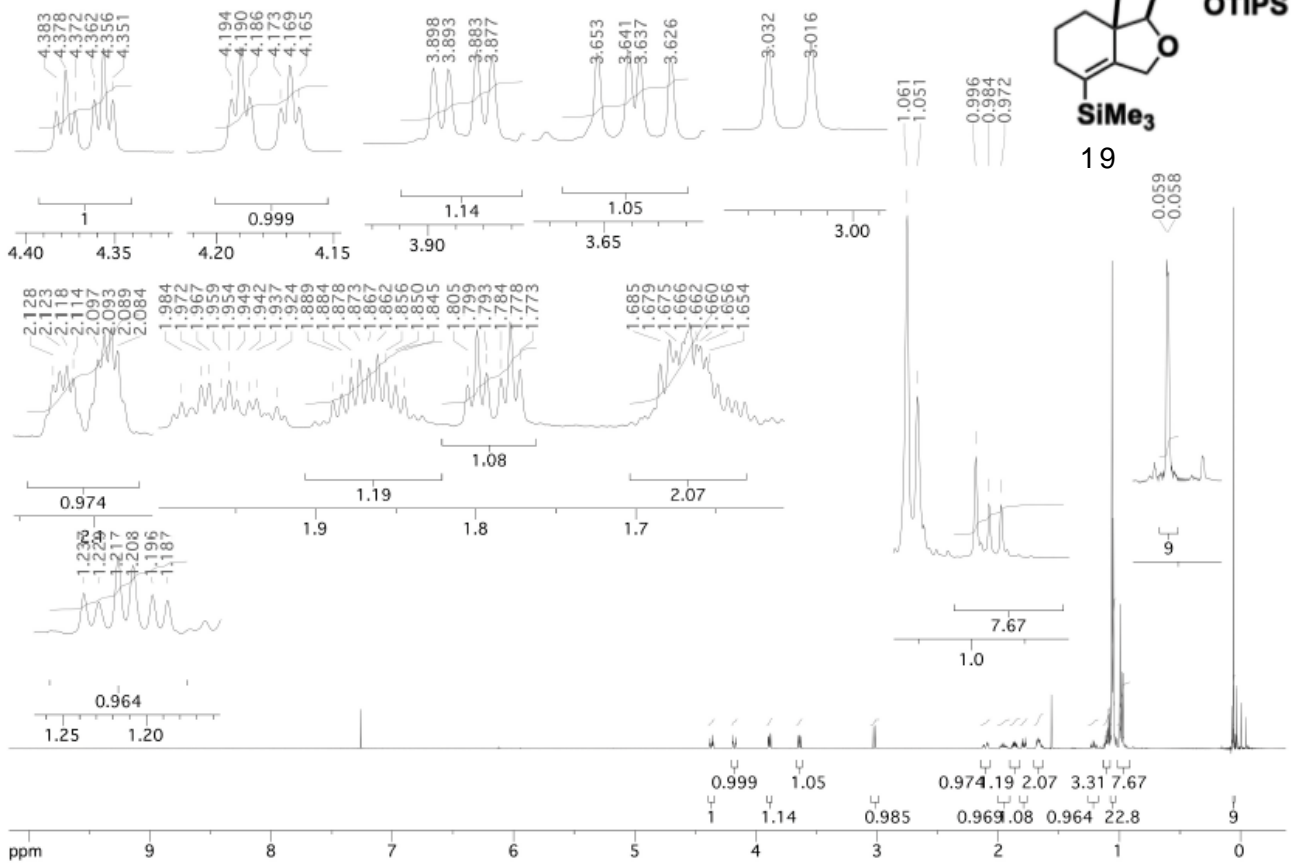

<sup>13</sup>C NMR (CDCl<sub>3</sub>, 150 MHz)

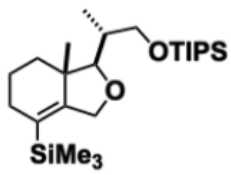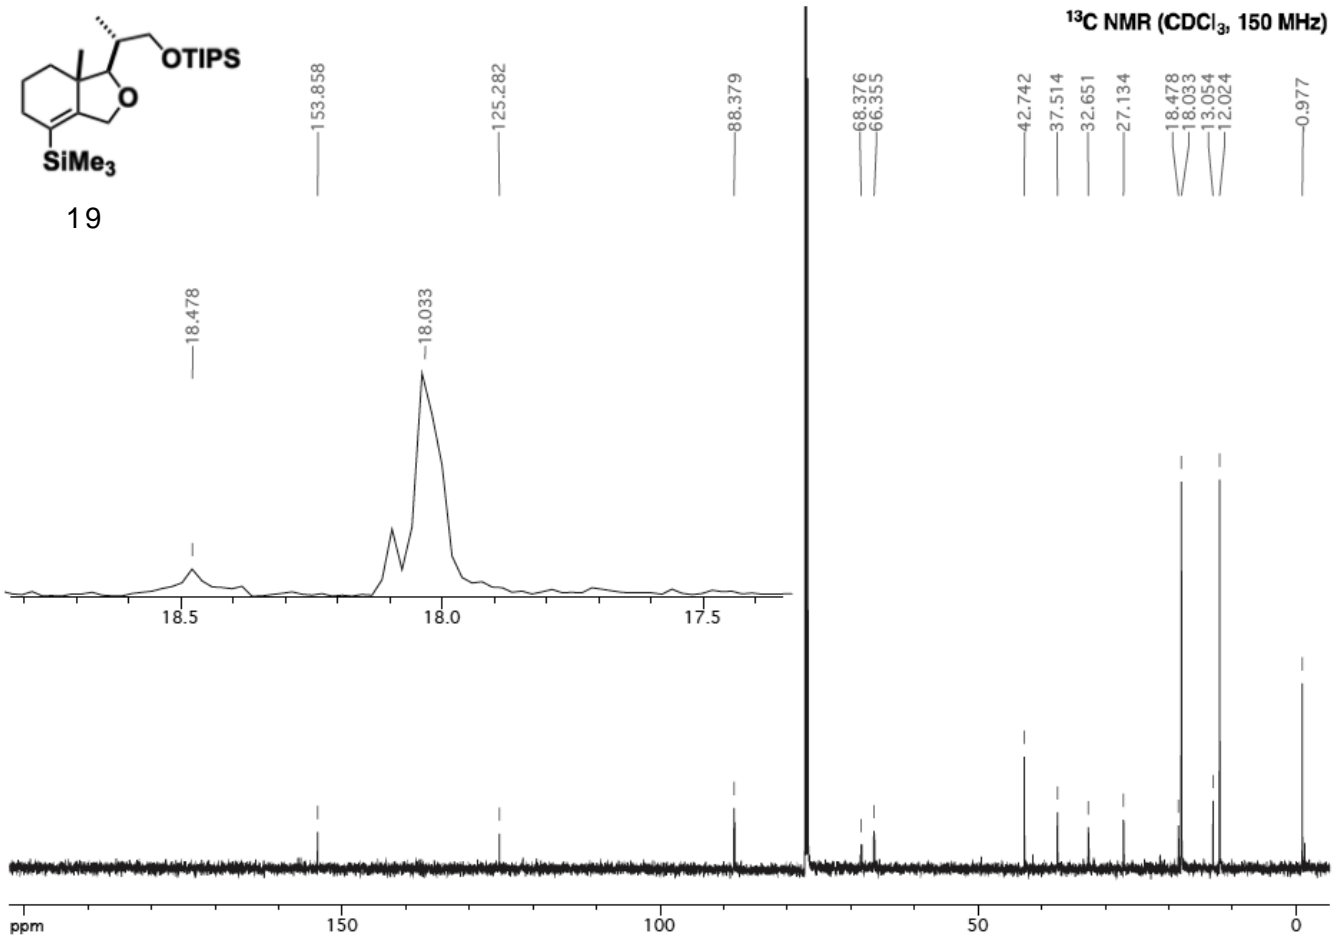

<sup>1</sup>H NMR (CDCl<sub>3</sub>, 600 MHz)

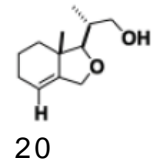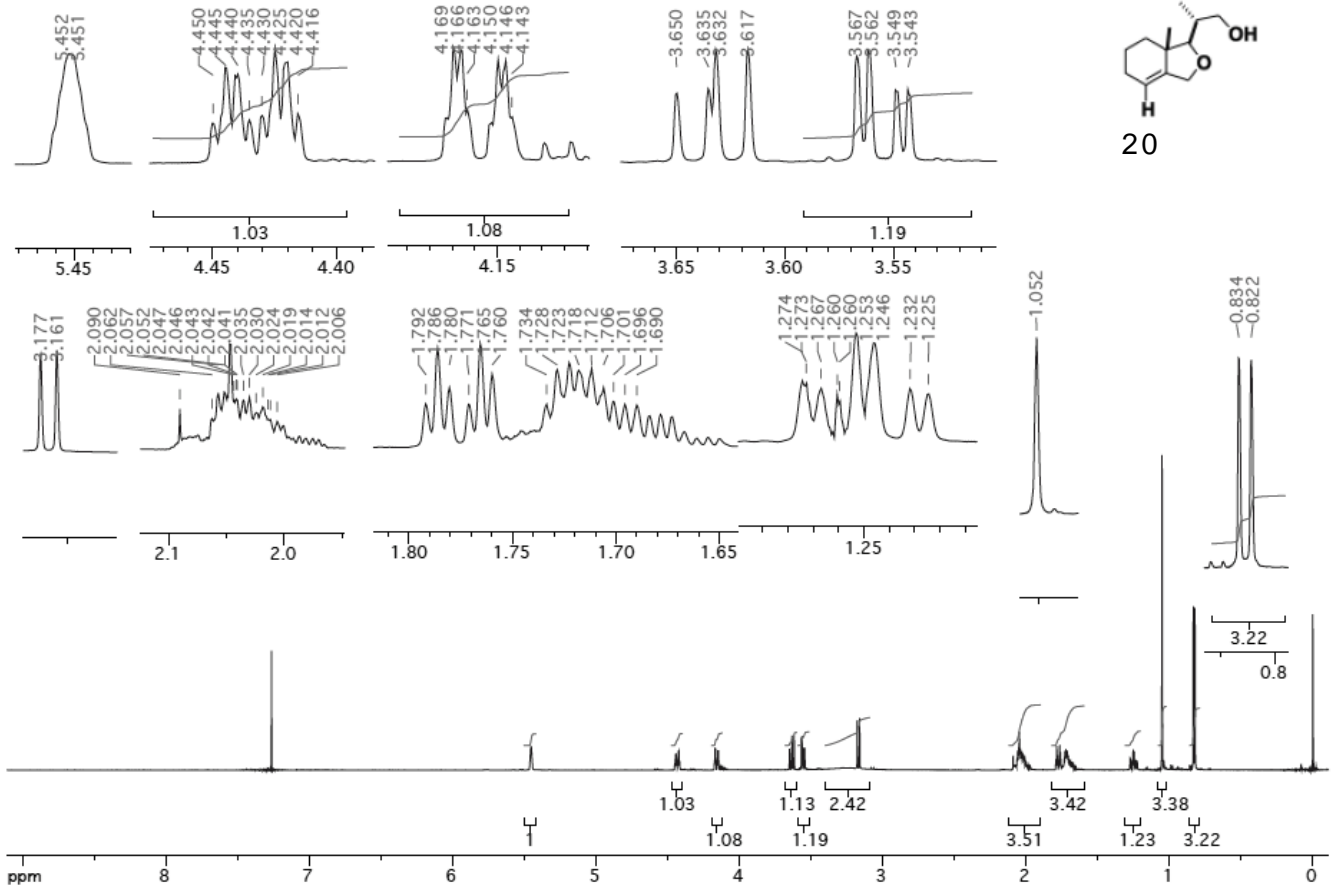

<sup>13</sup>C NMR (CDCl<sub>3</sub>, 150 MHz)

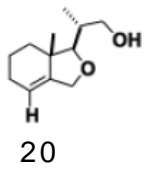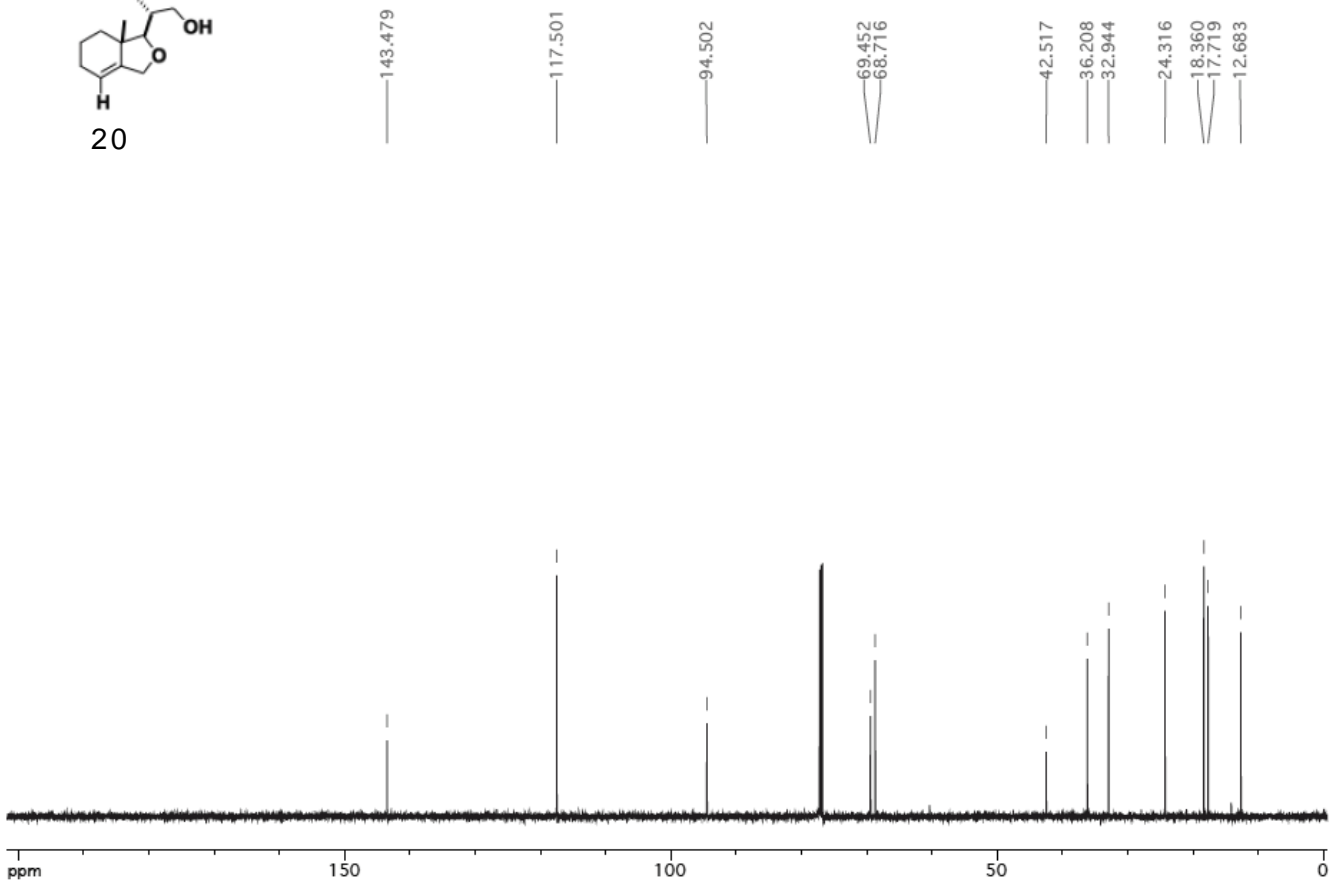

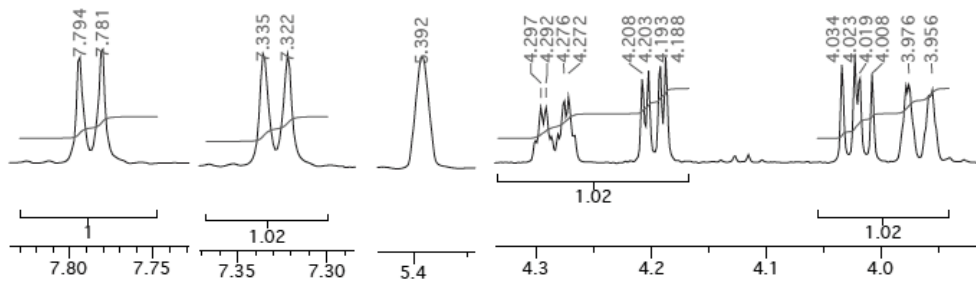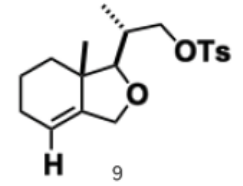

**<sup>1</sup>H NMR (CDCl<sub>3</sub>, 600 MHz)**

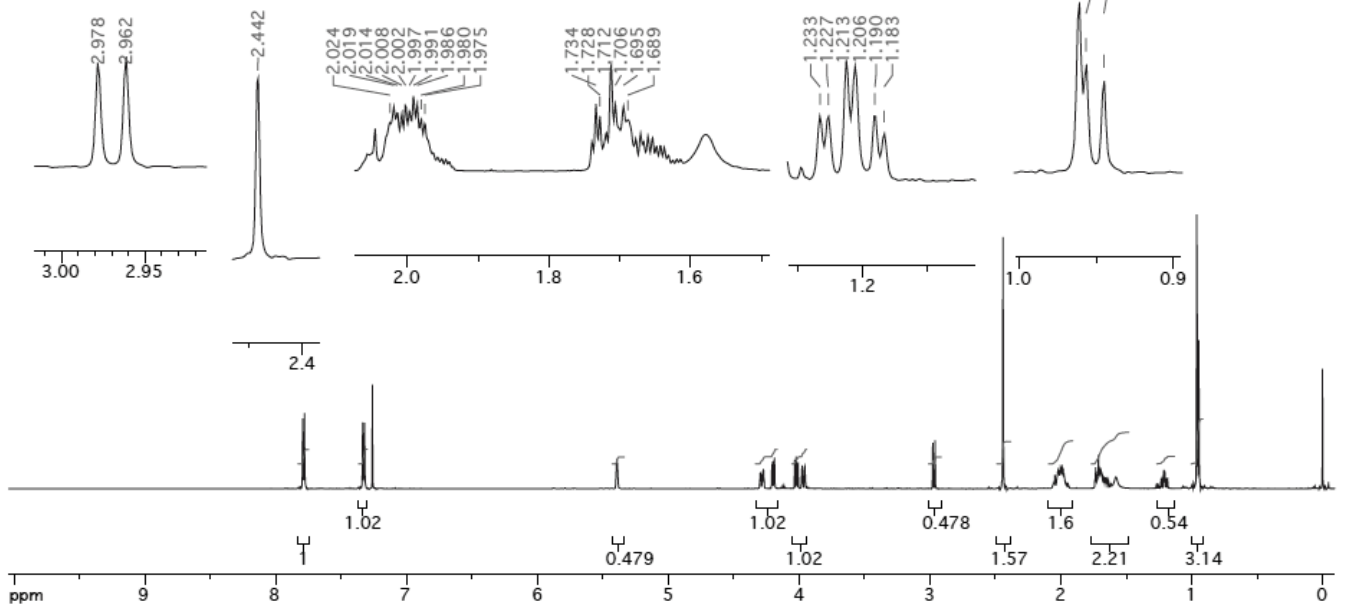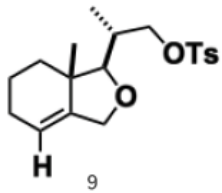

**<sup>13</sup>C NMR (CDCl<sub>3</sub>, 150 MHz)**

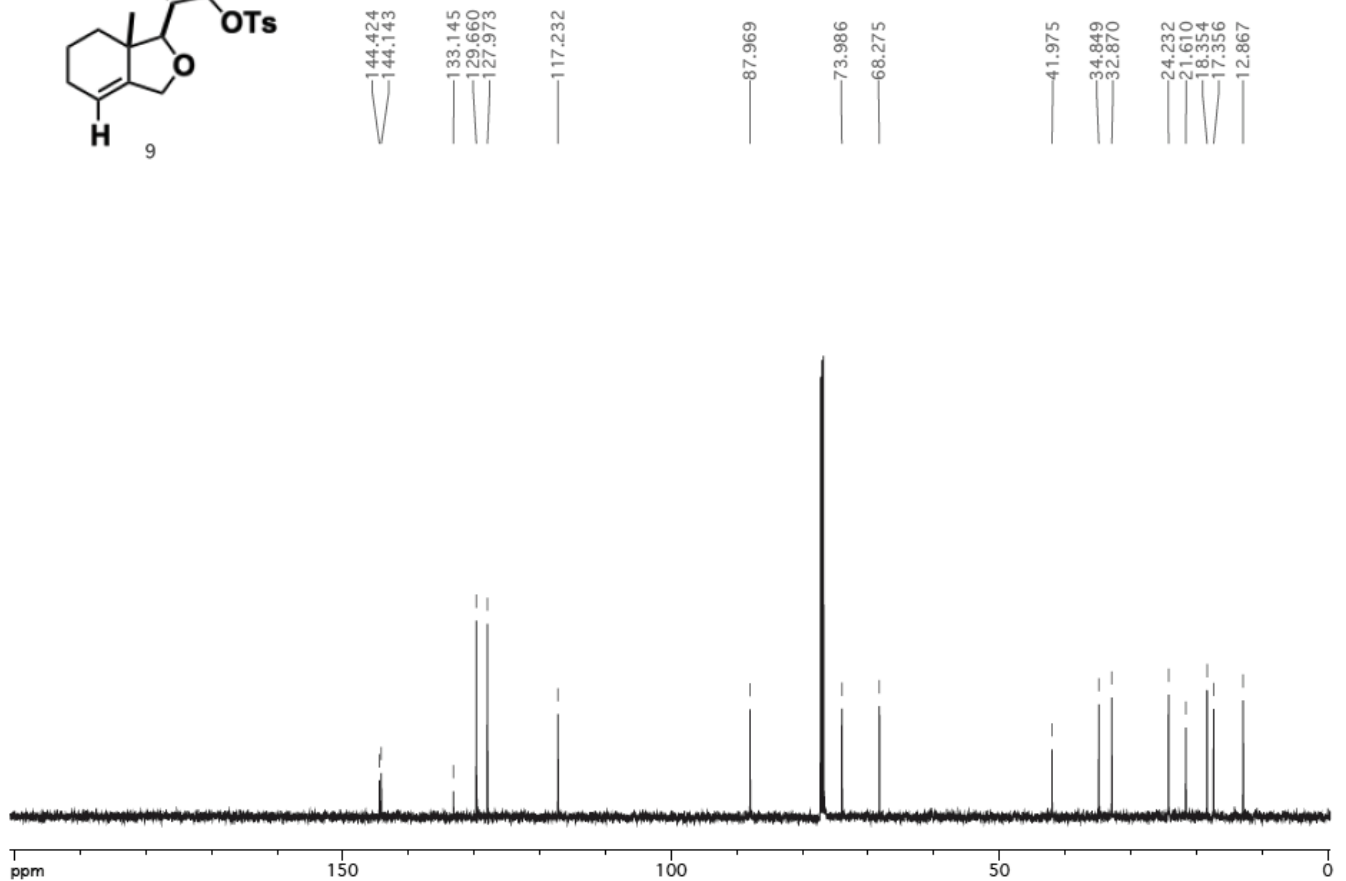

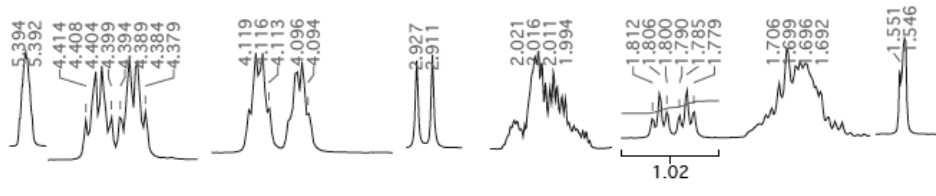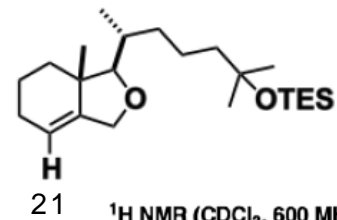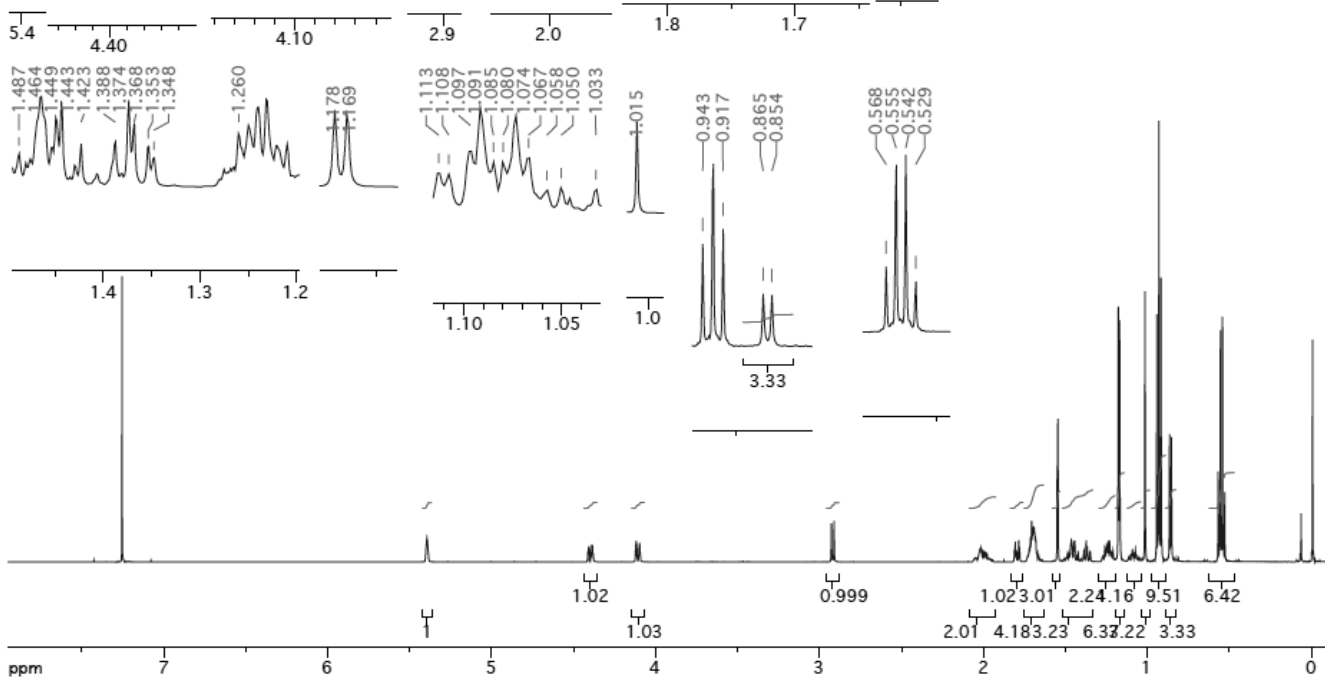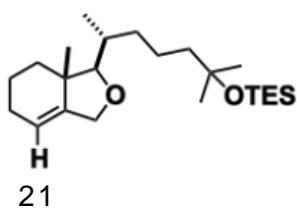

<sup>13</sup>C NMR (CDCl<sub>3</sub>, 150 MHz)

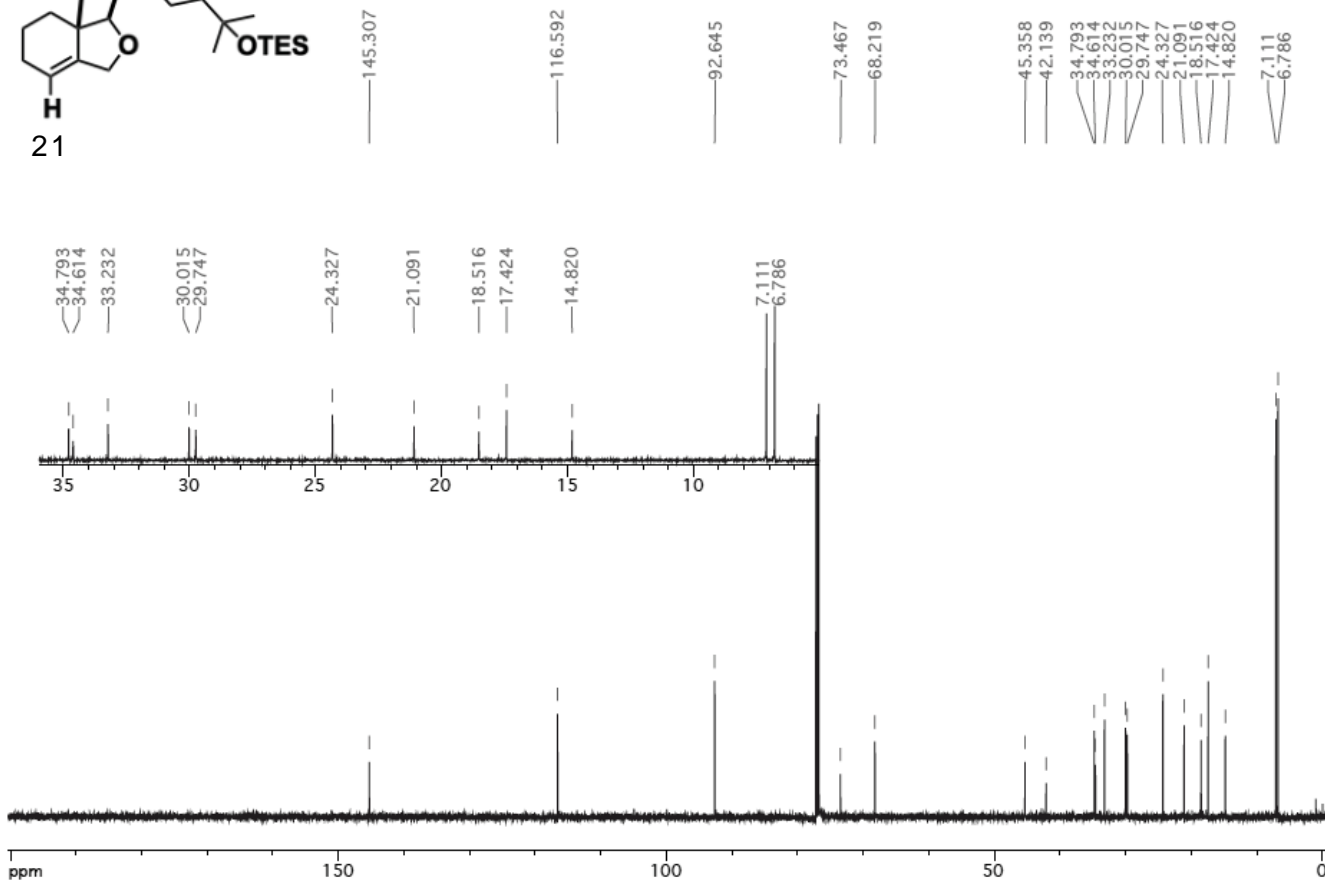

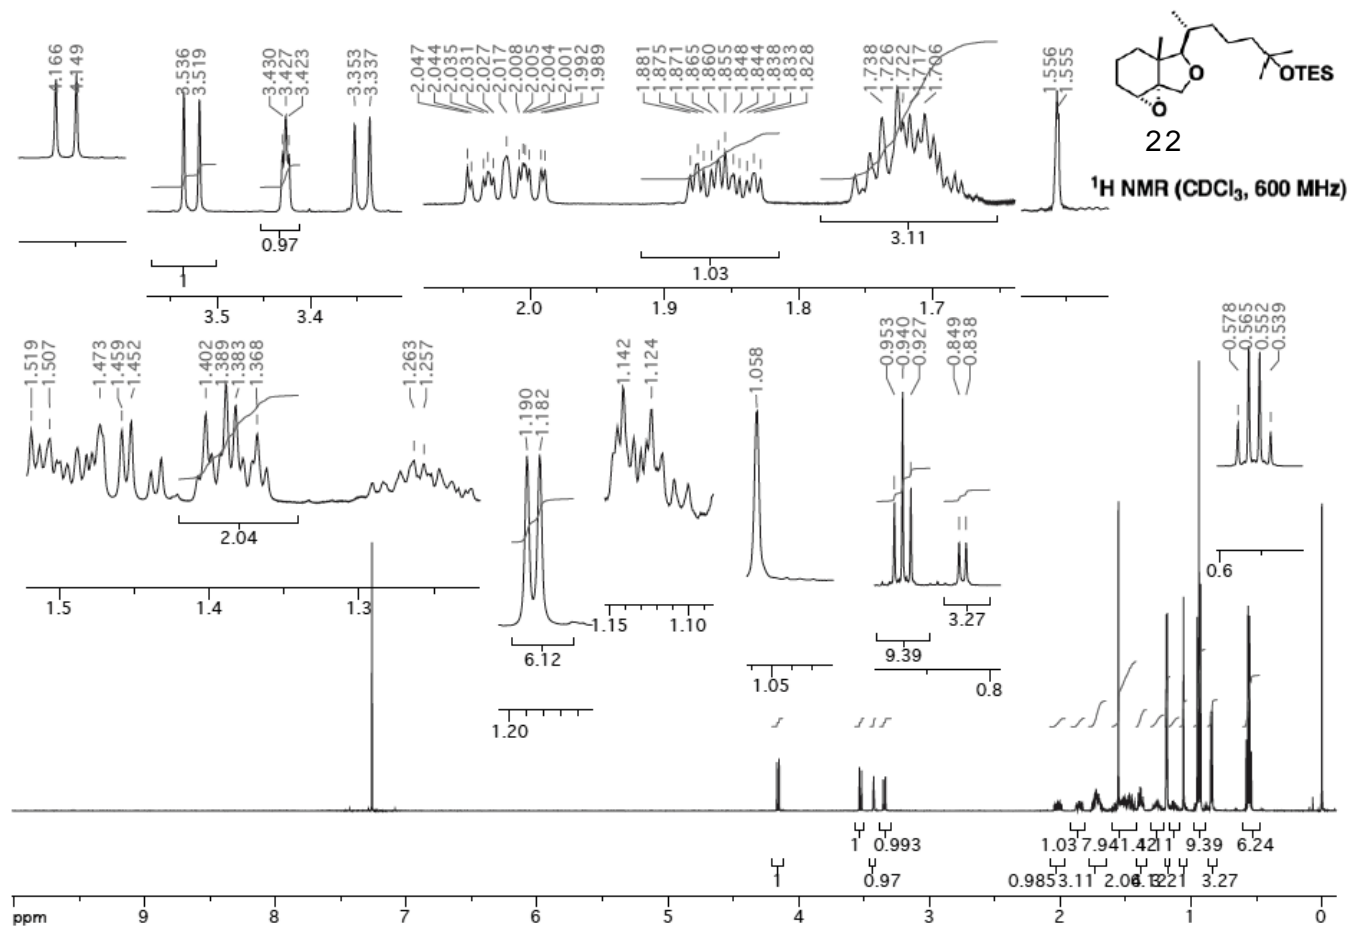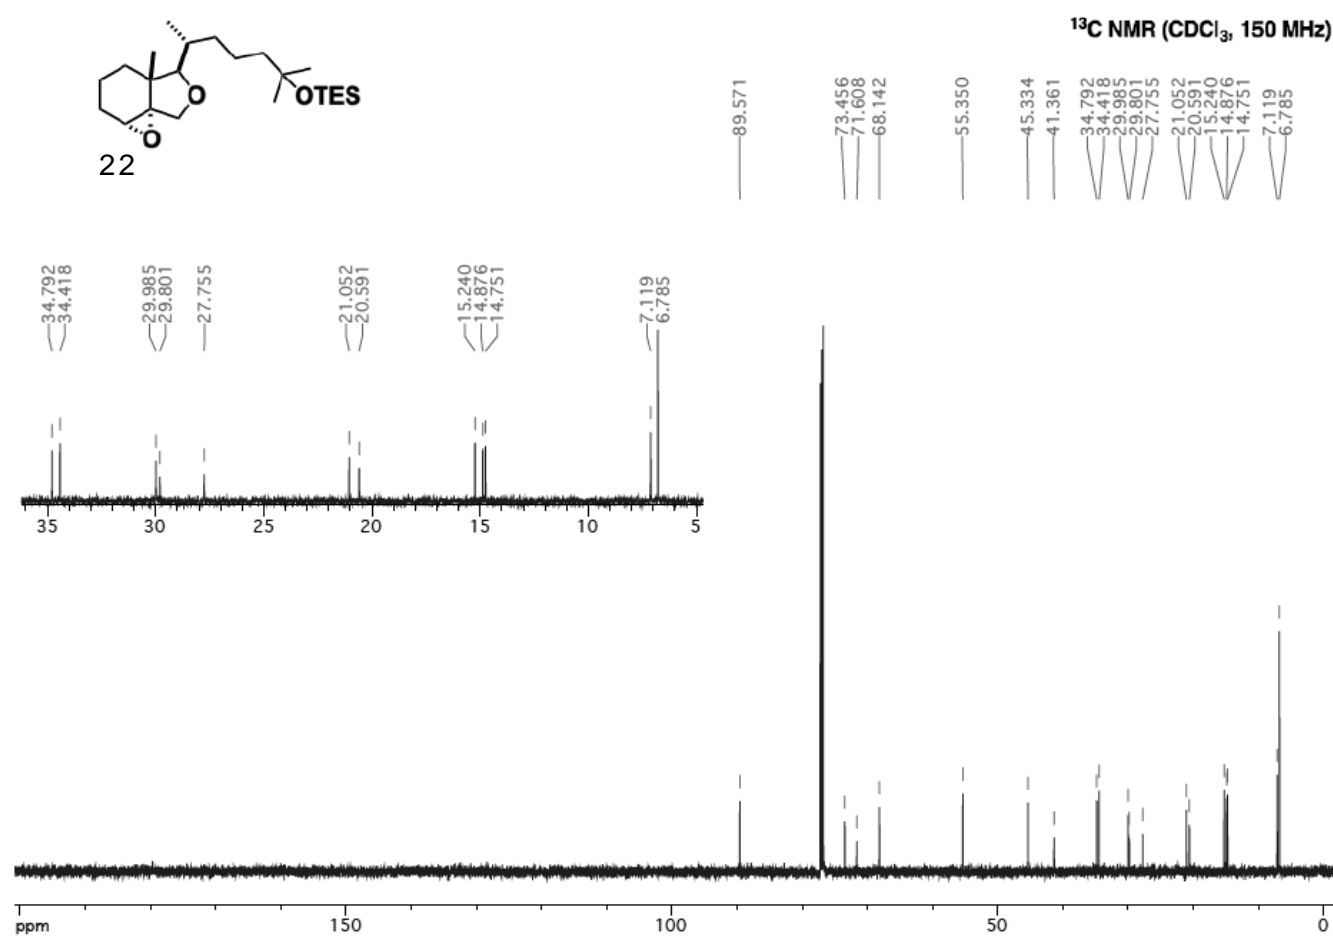

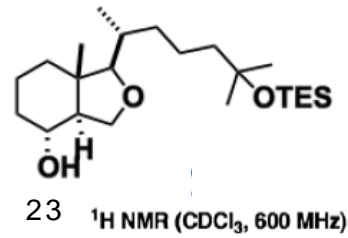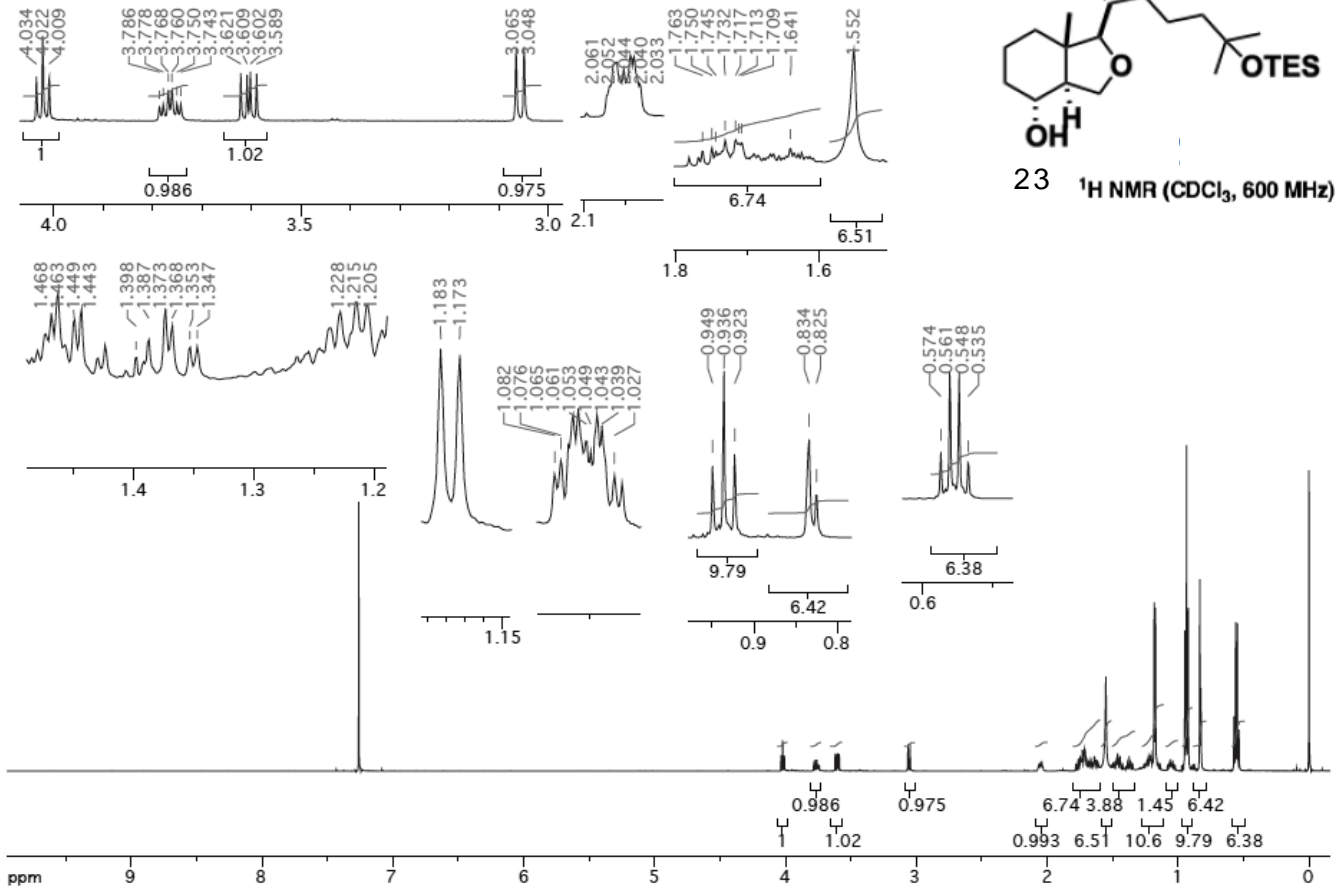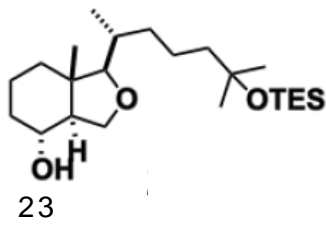

<sup>13</sup>C NMR (CDCl<sub>3</sub>, 150 MHz)

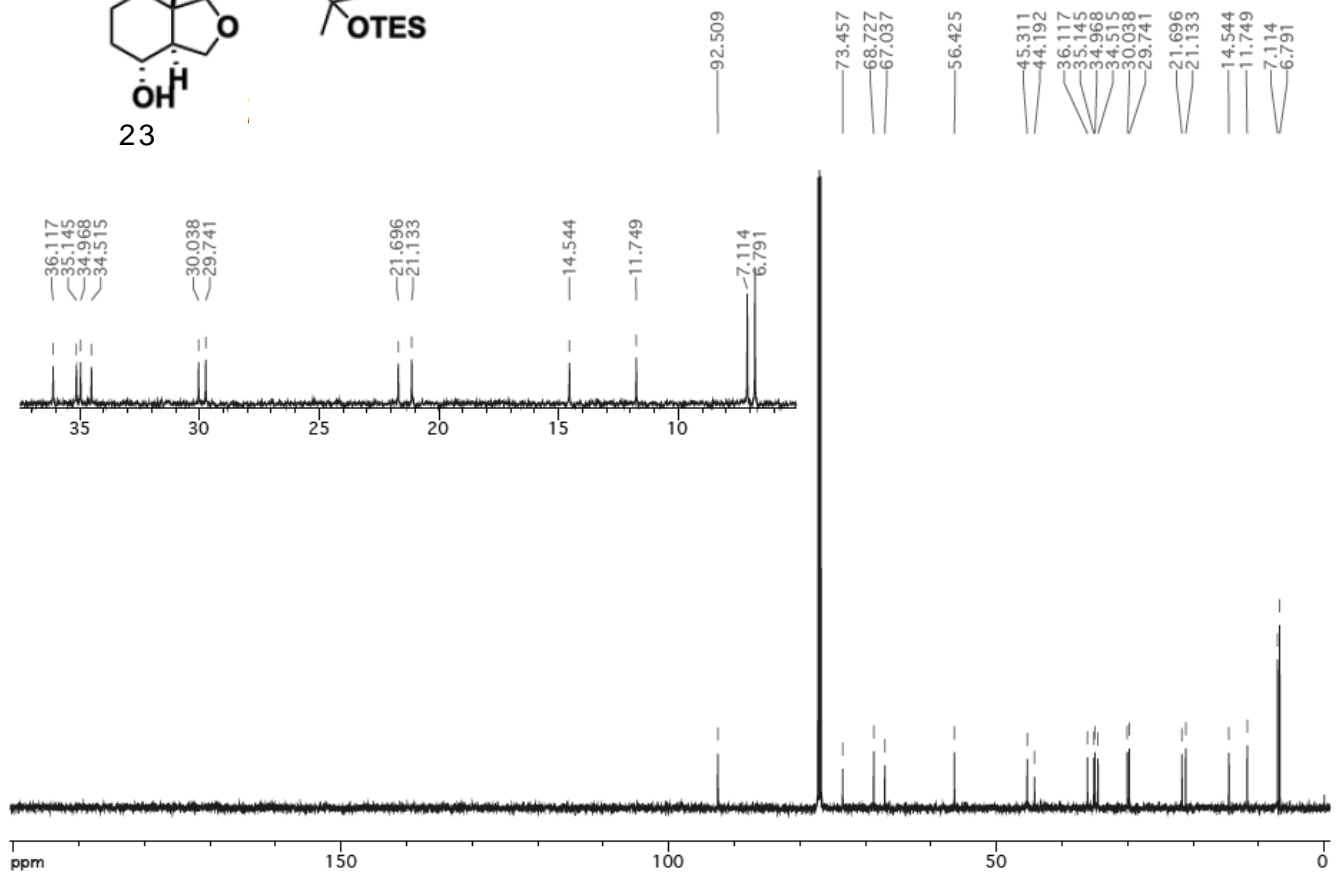

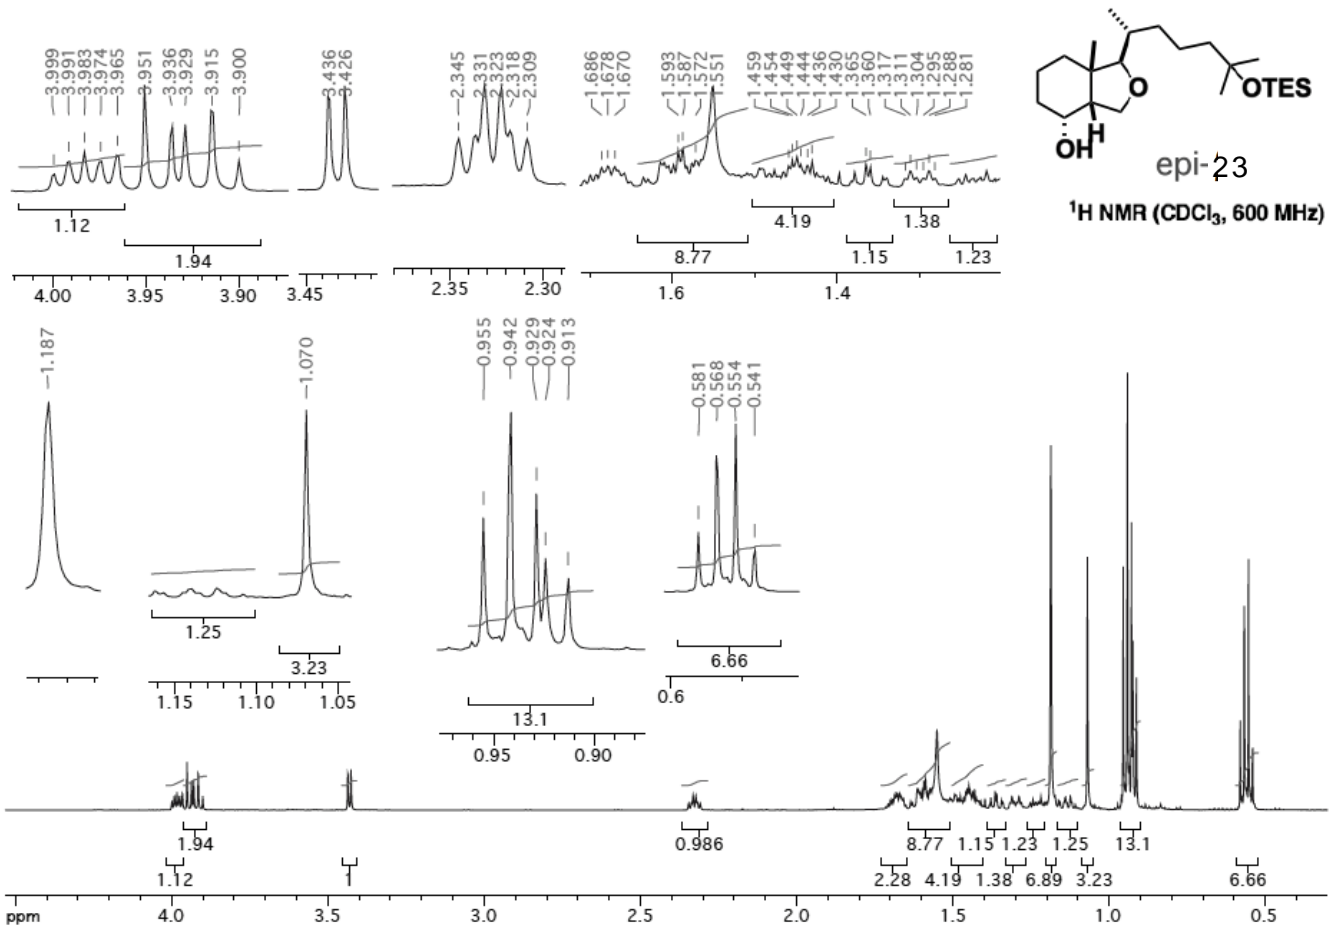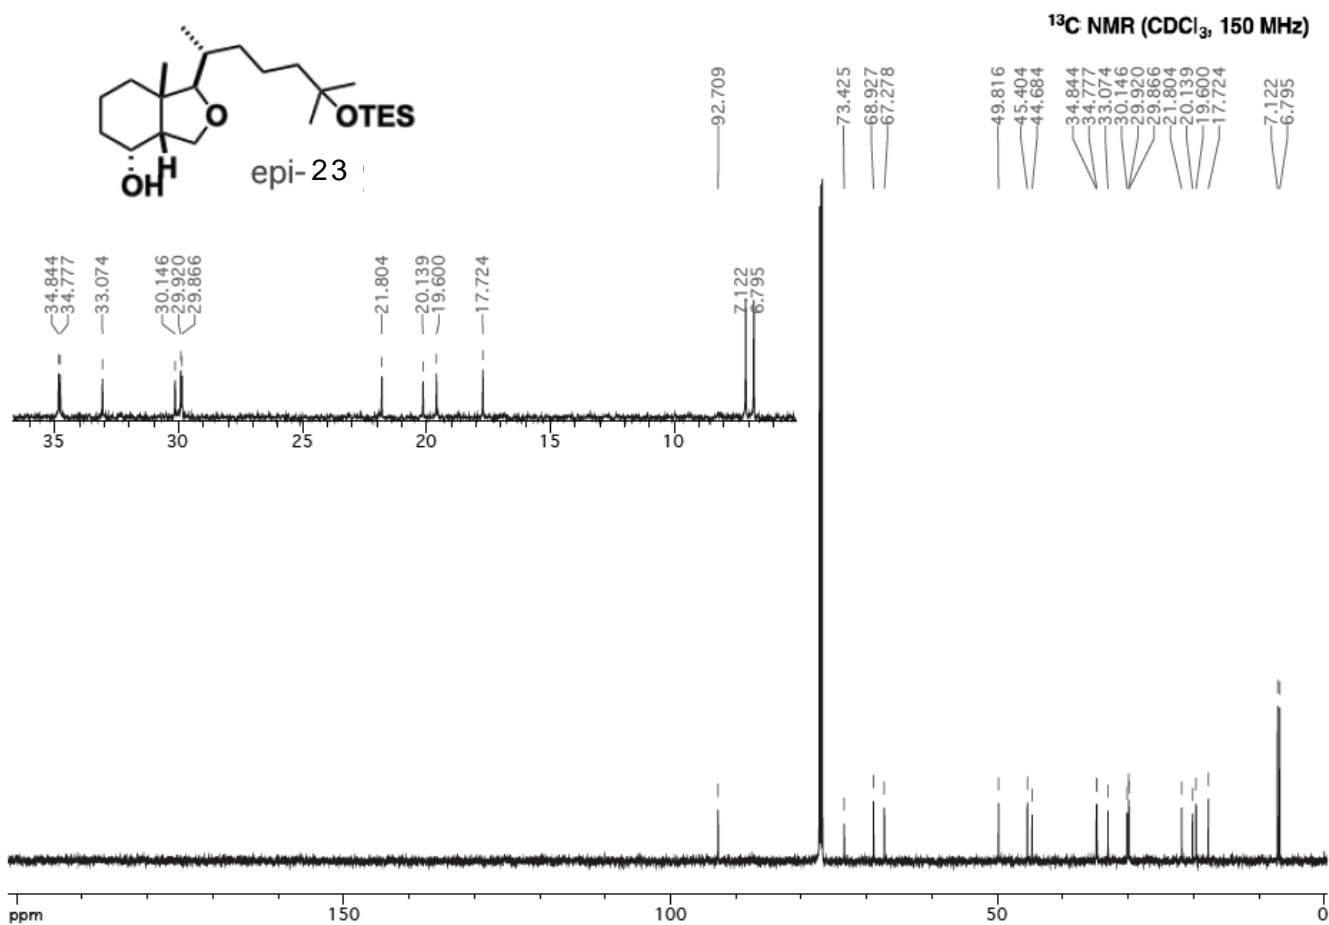

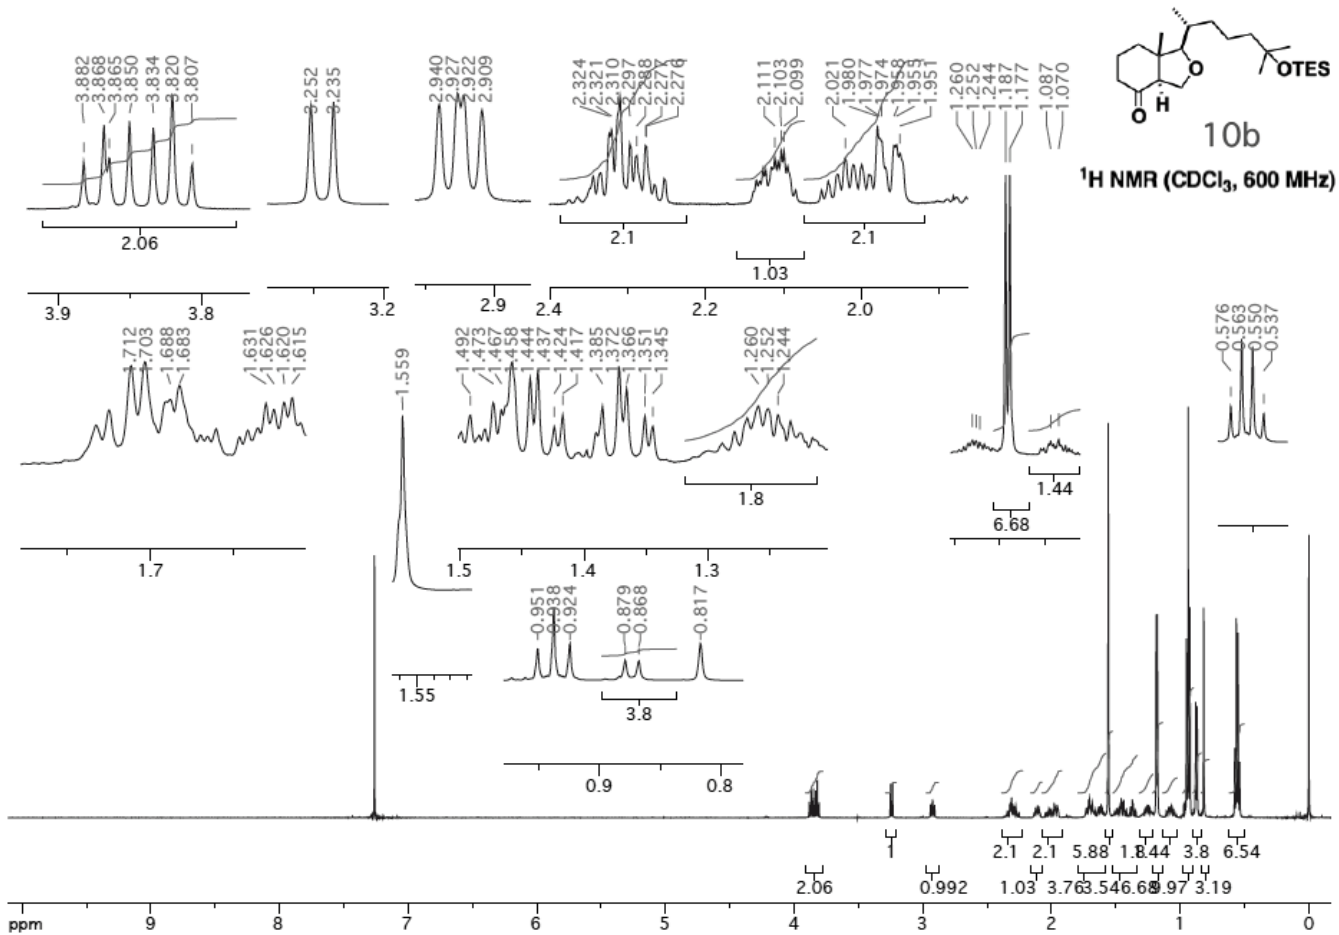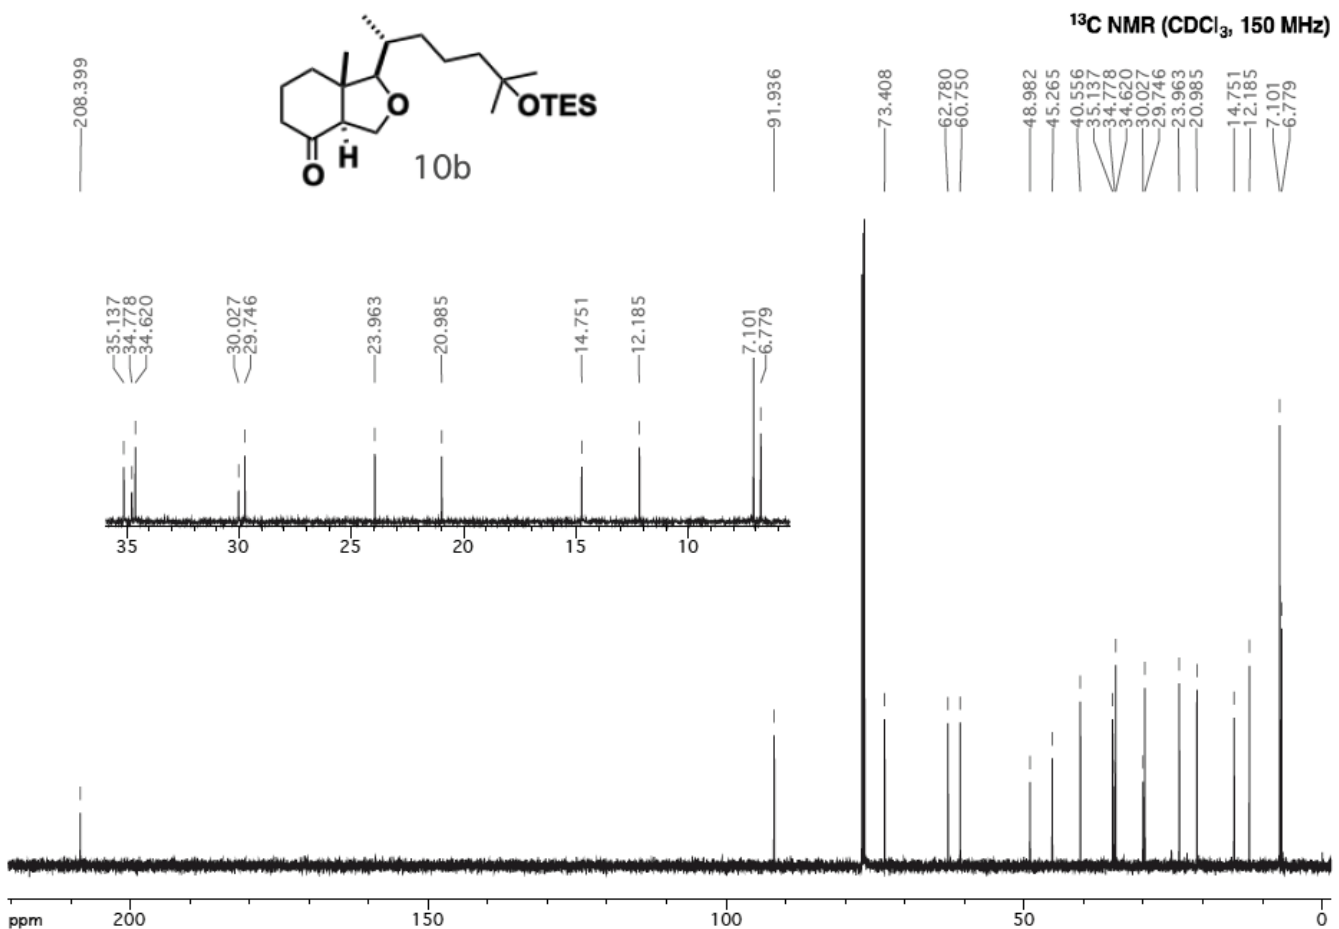



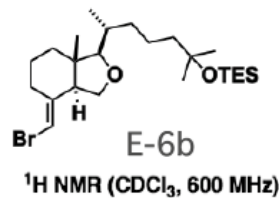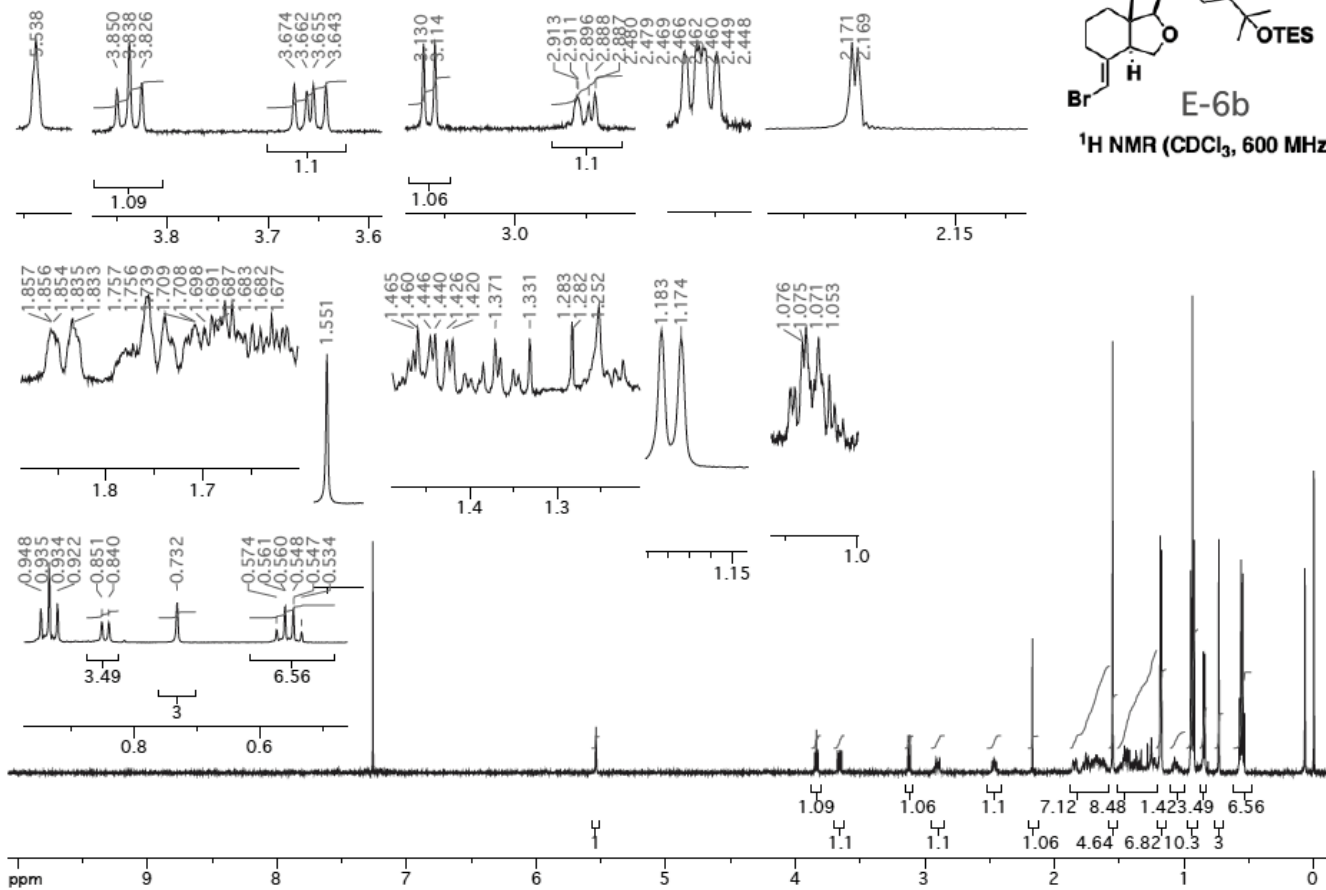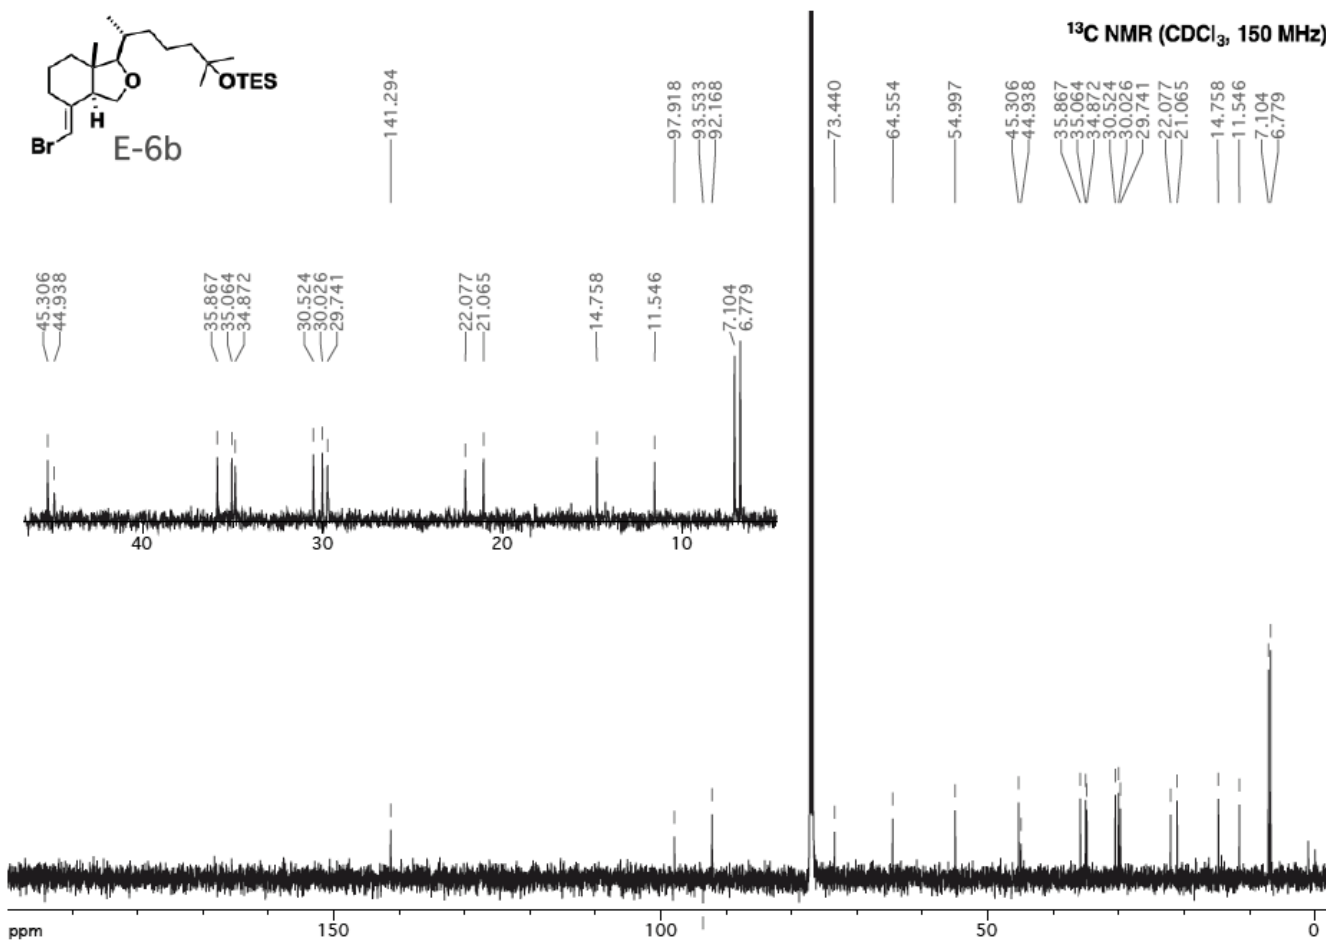

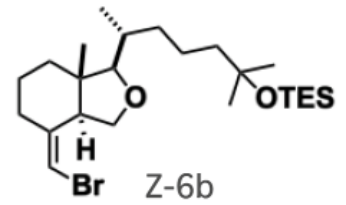

<sup>1</sup>H NMR (CDCl<sub>3</sub>, 600 MHz)

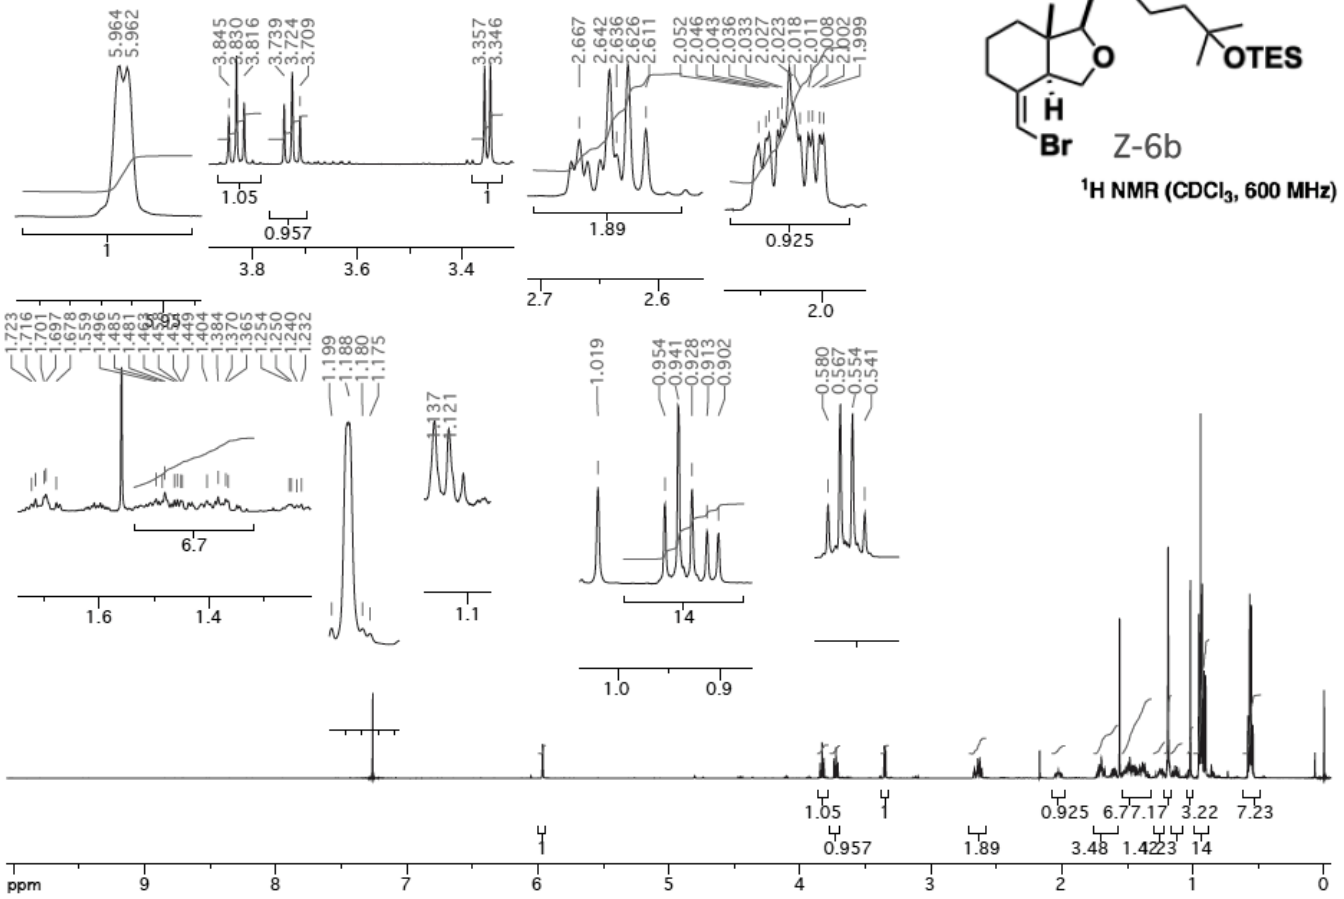

<sup>13</sup>C NMR (CDCl<sub>3</sub>, 150 MHz)

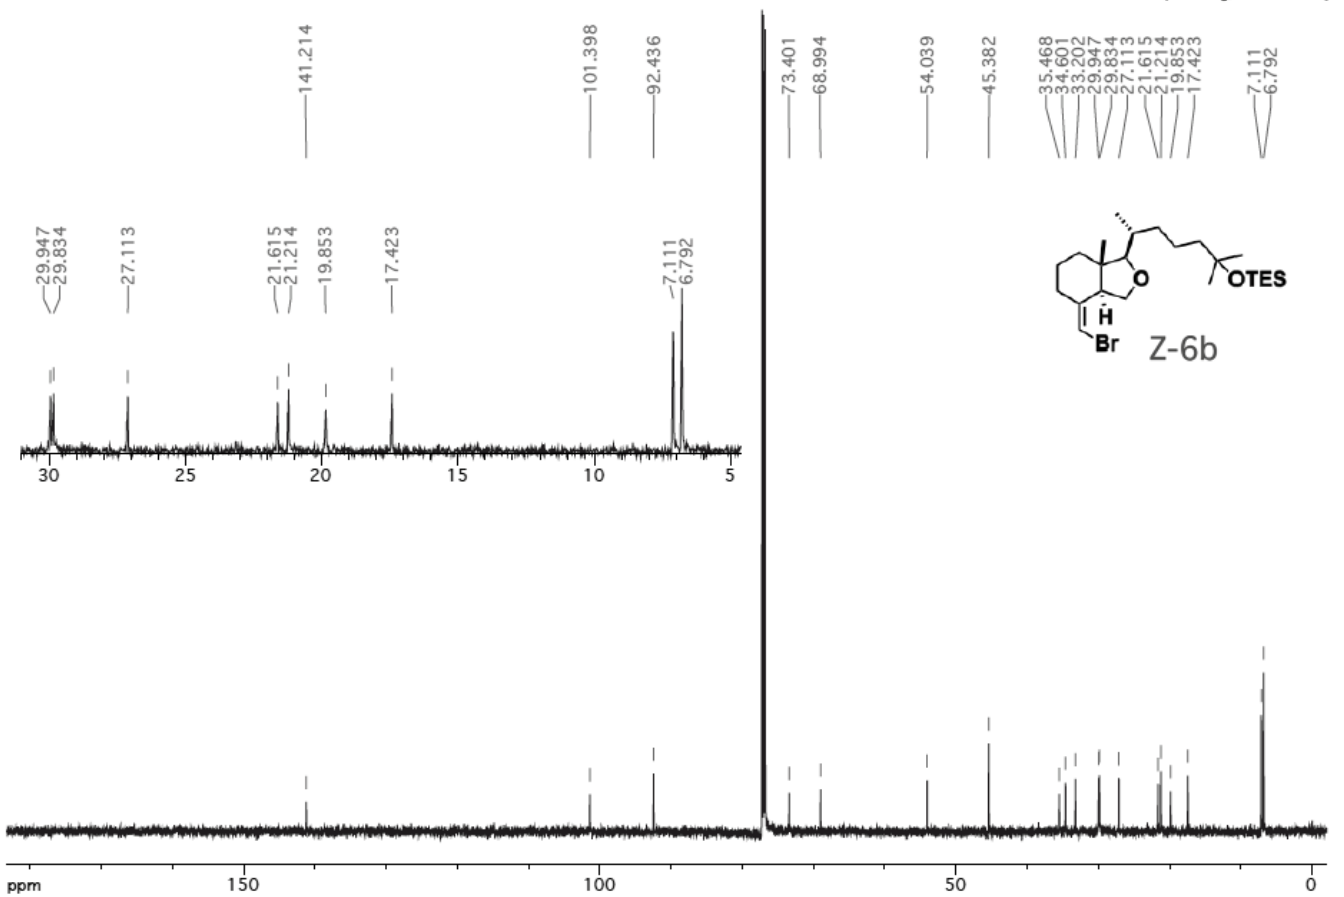

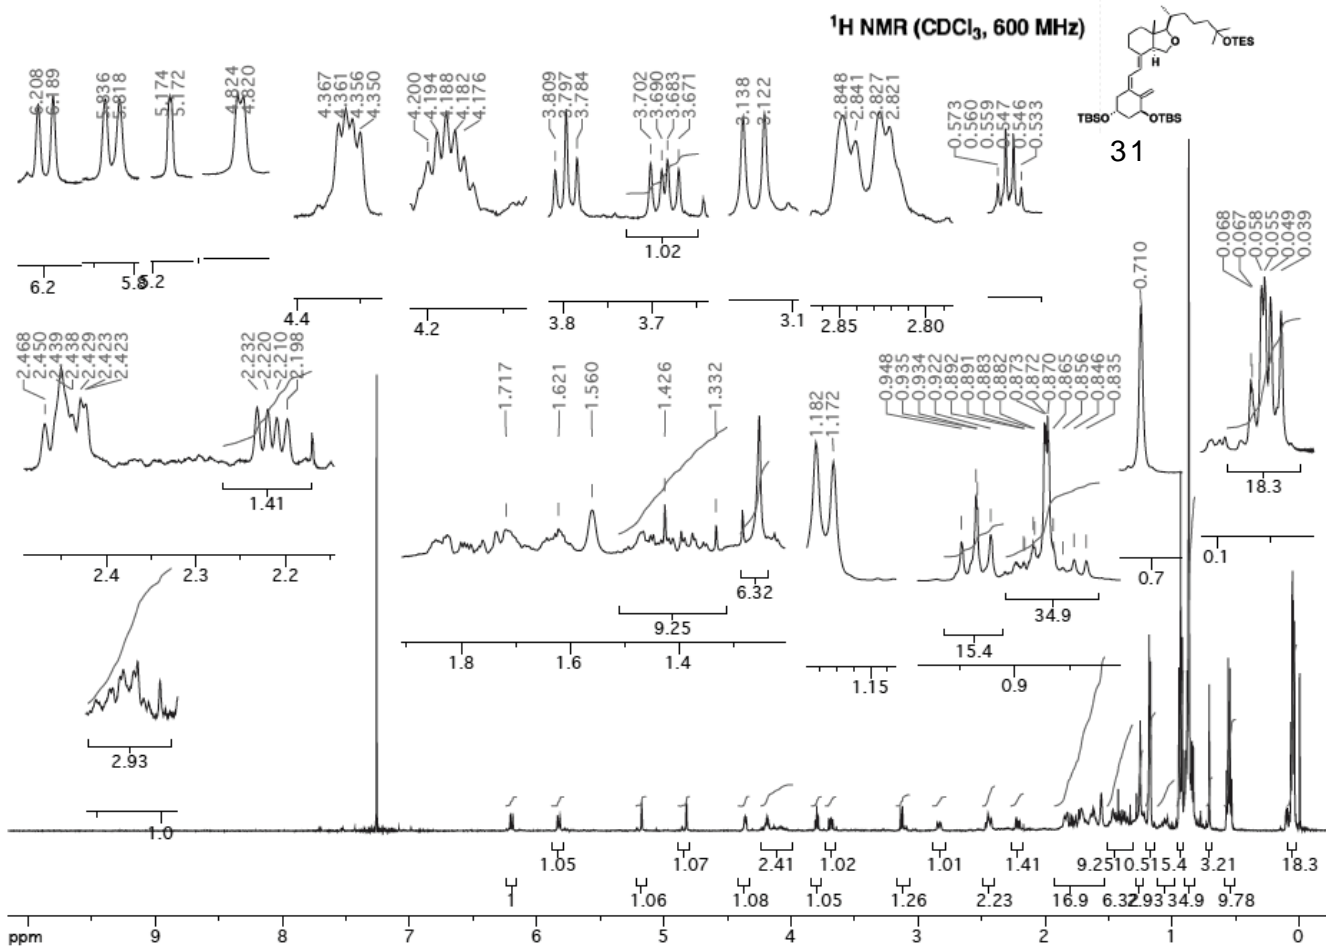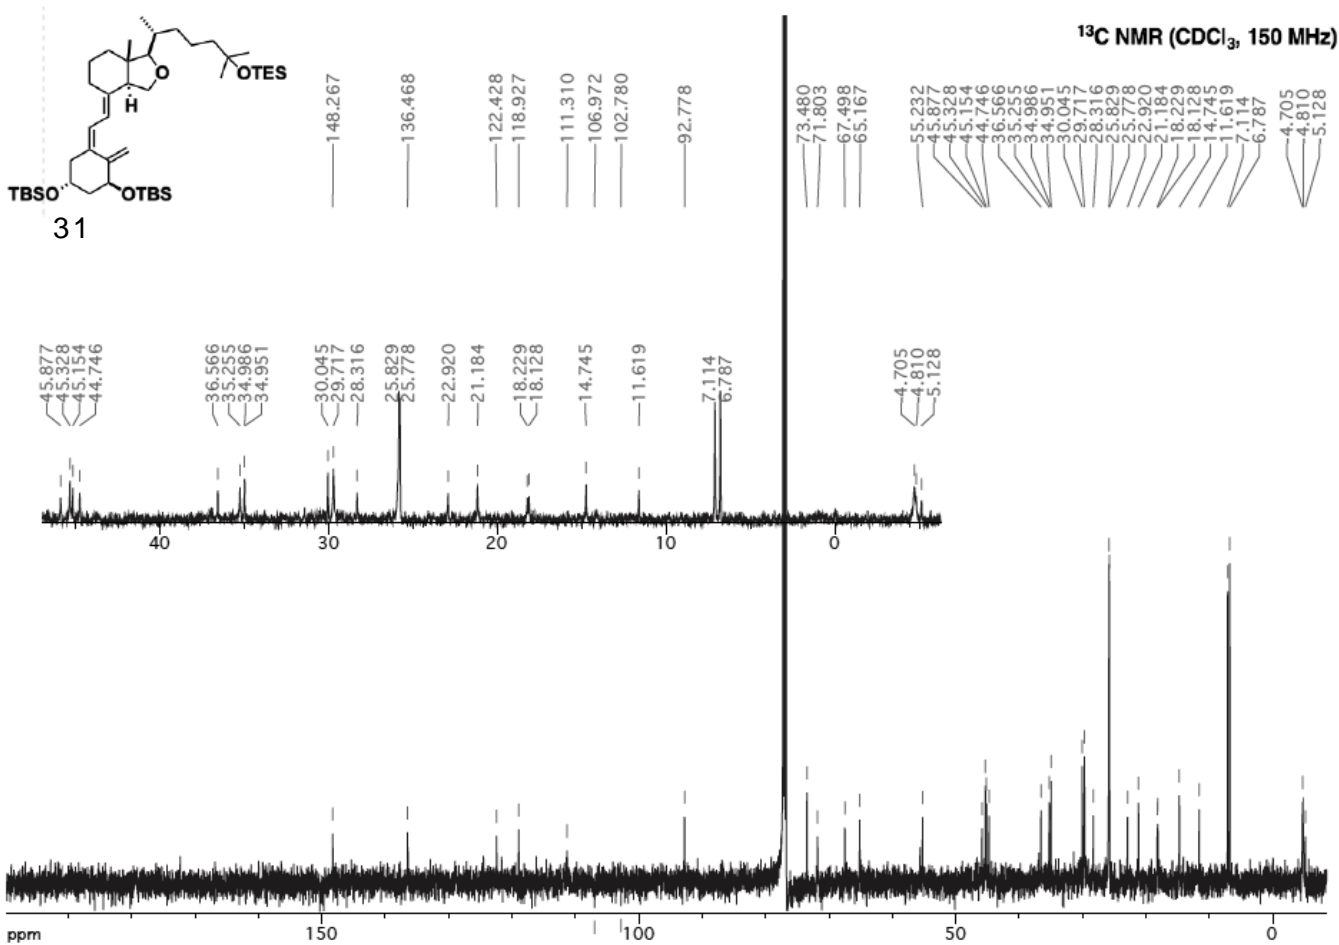

<sup>1</sup>H NMR (CDCl<sub>3</sub>, 600 MHz)

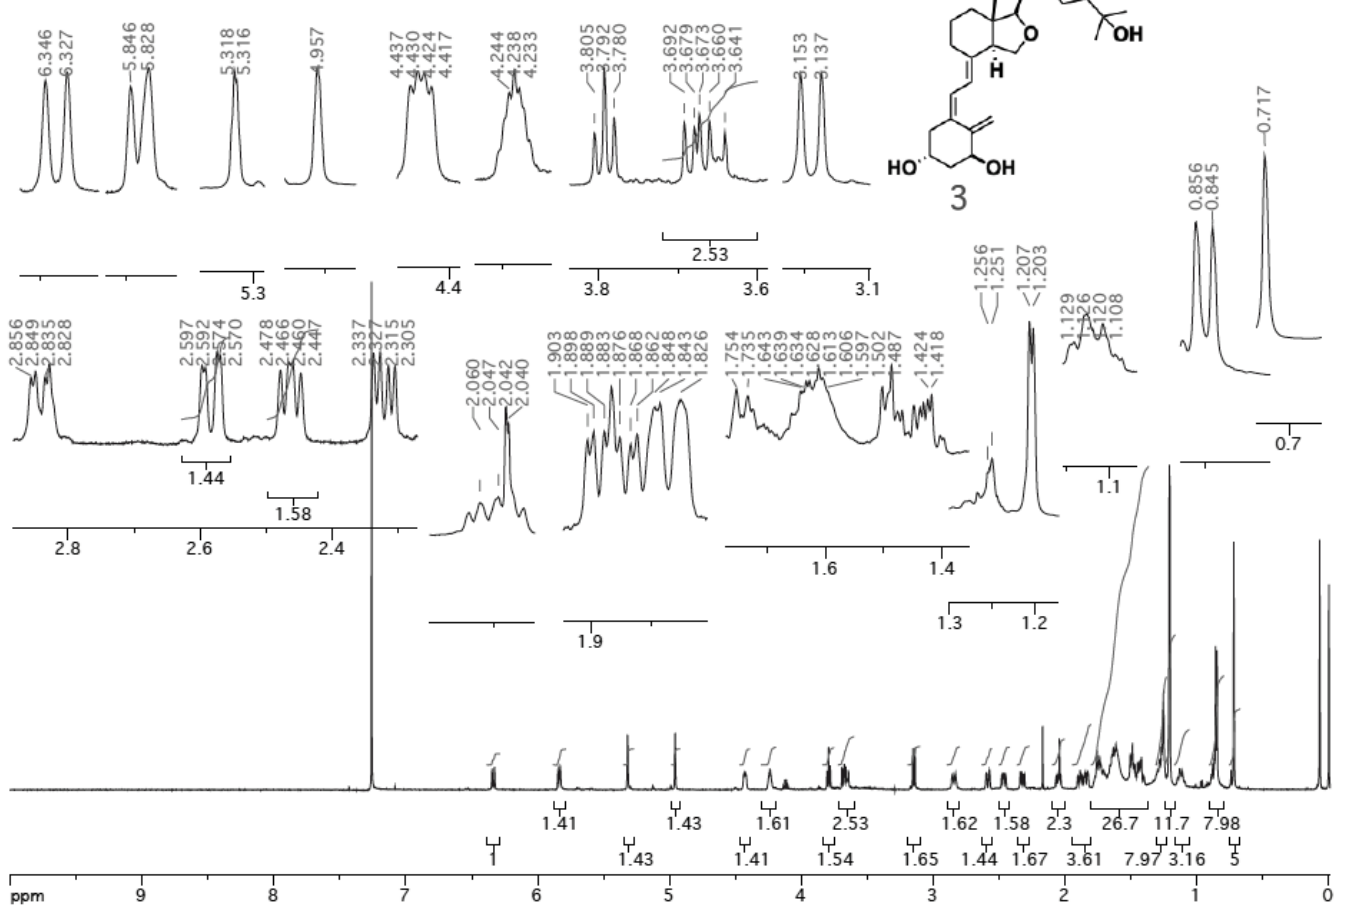

<sup>13</sup>C NMR (CDCl<sub>3</sub>, 150 MHz)

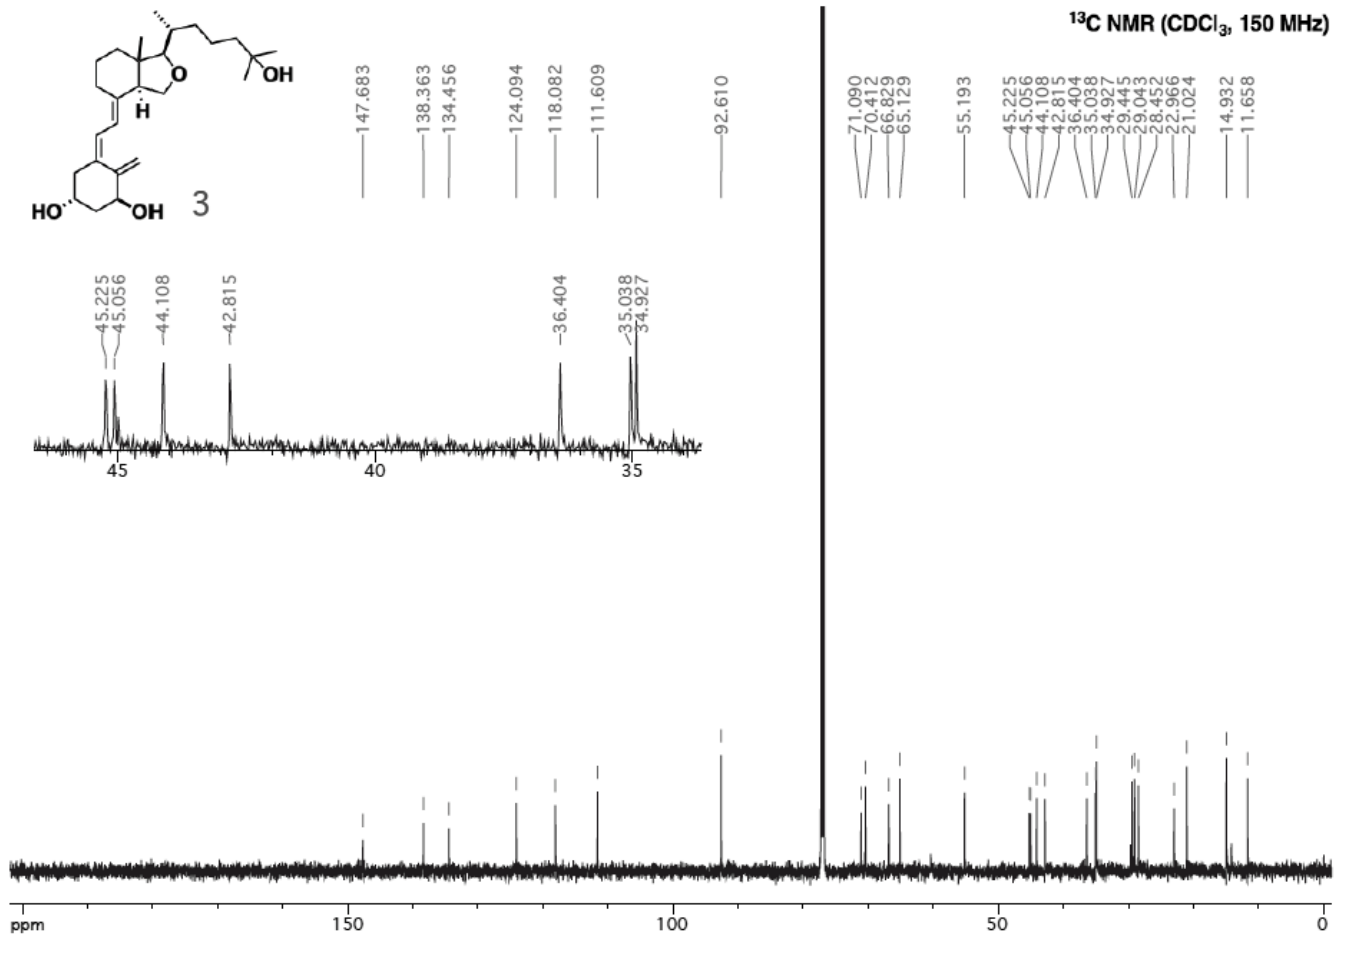

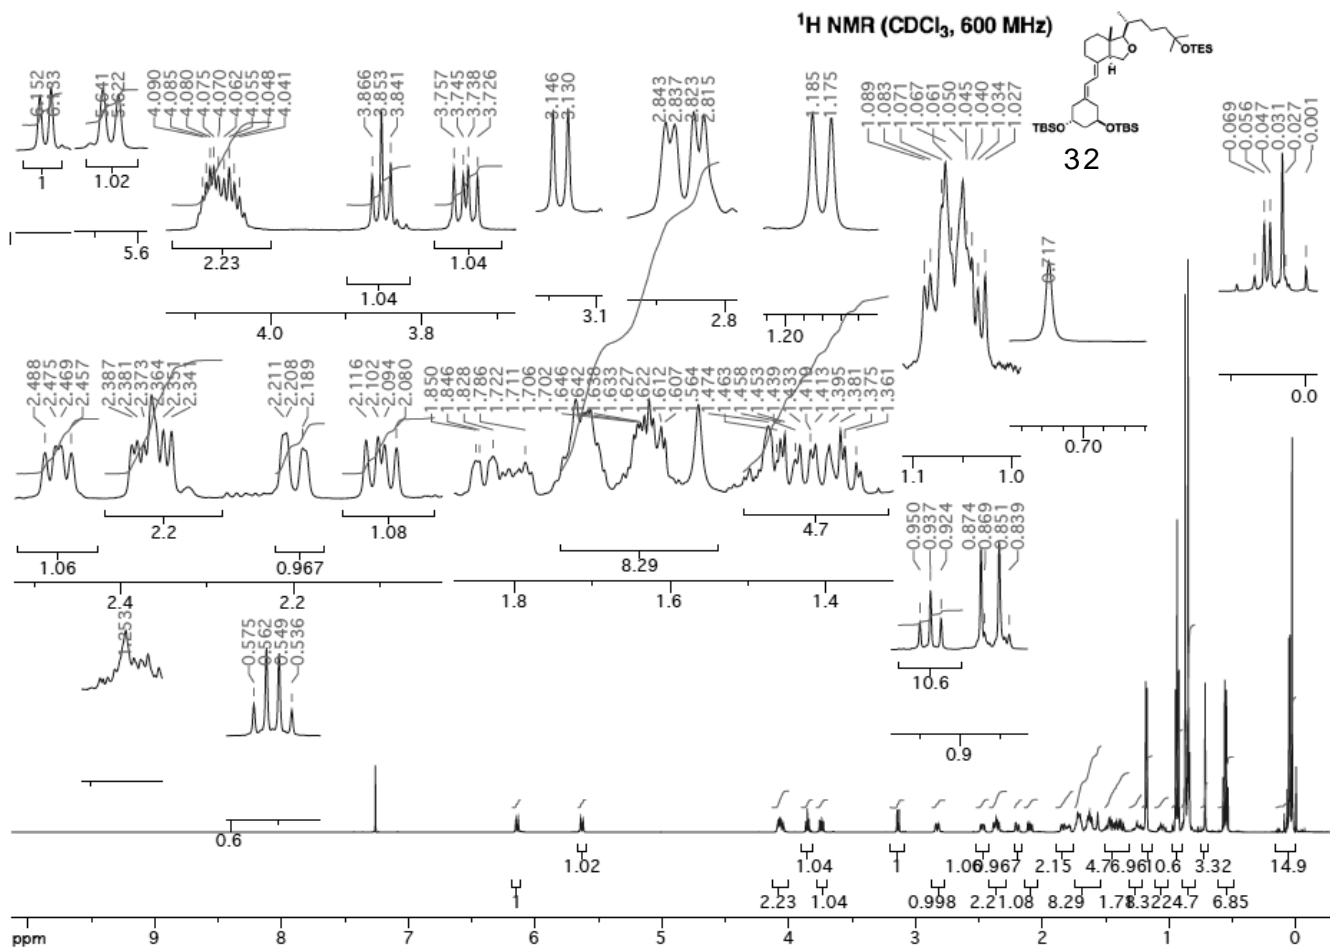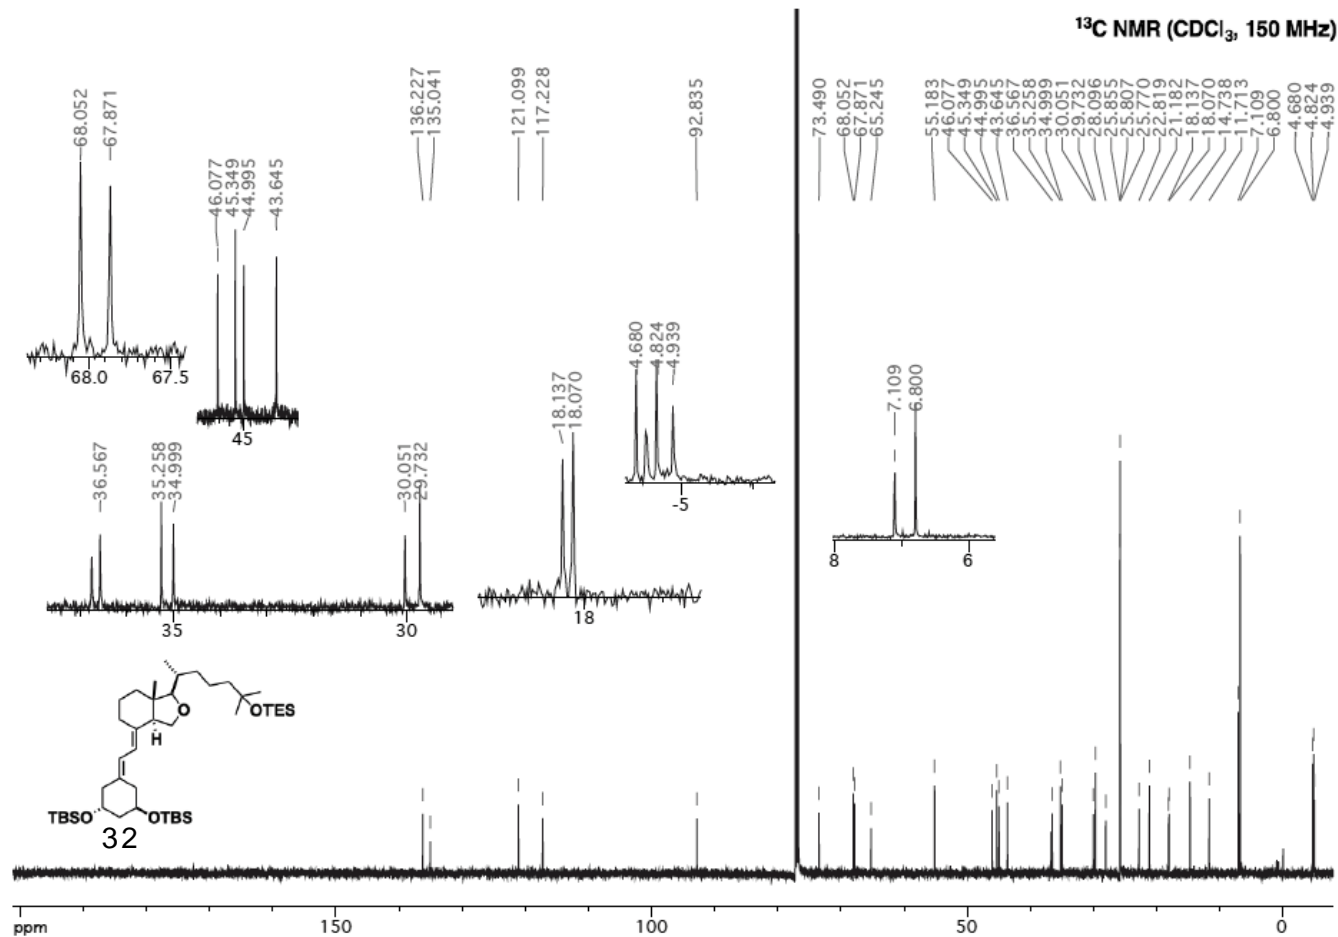

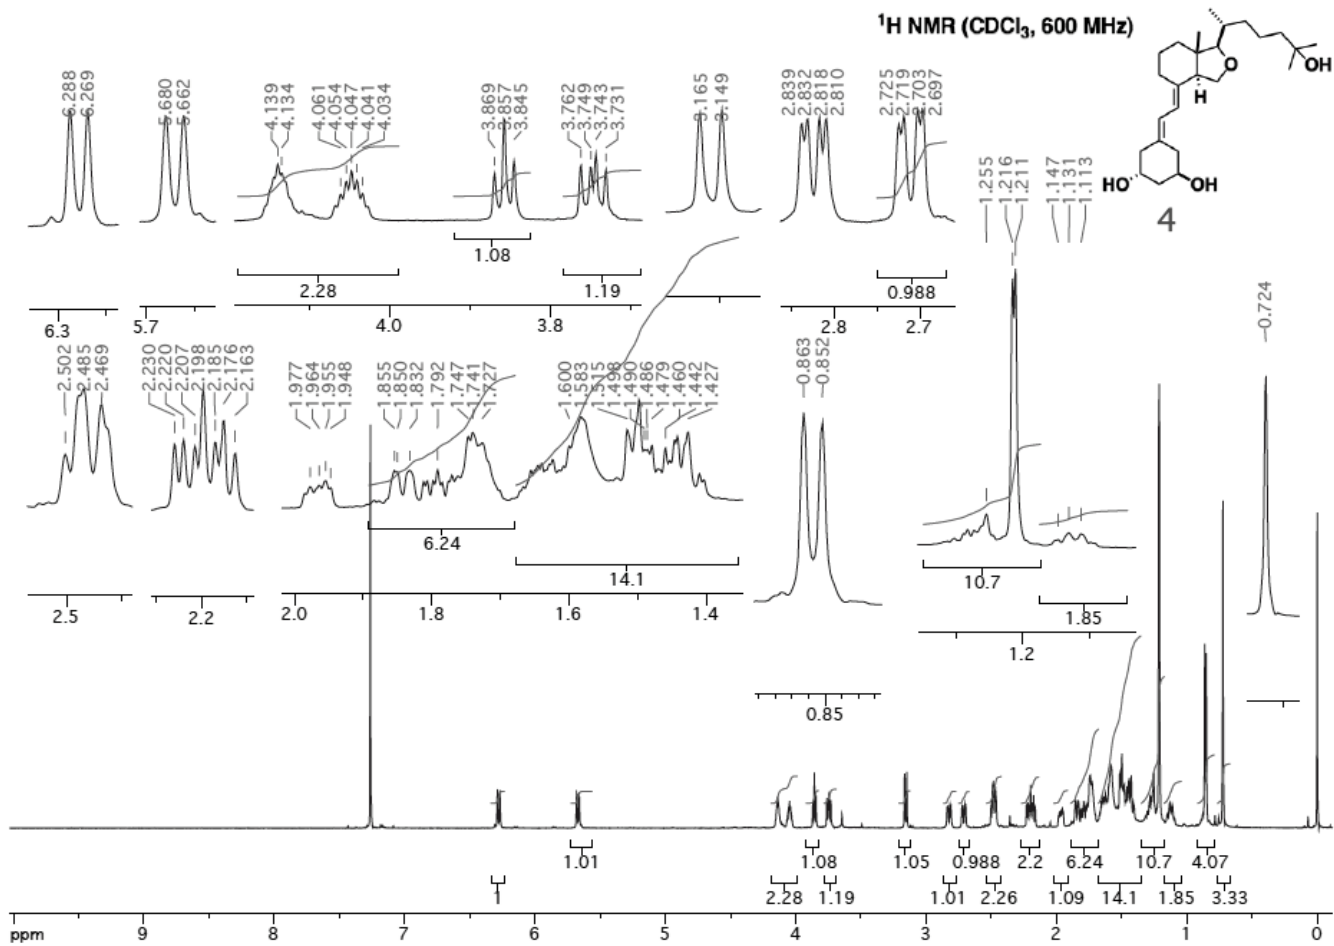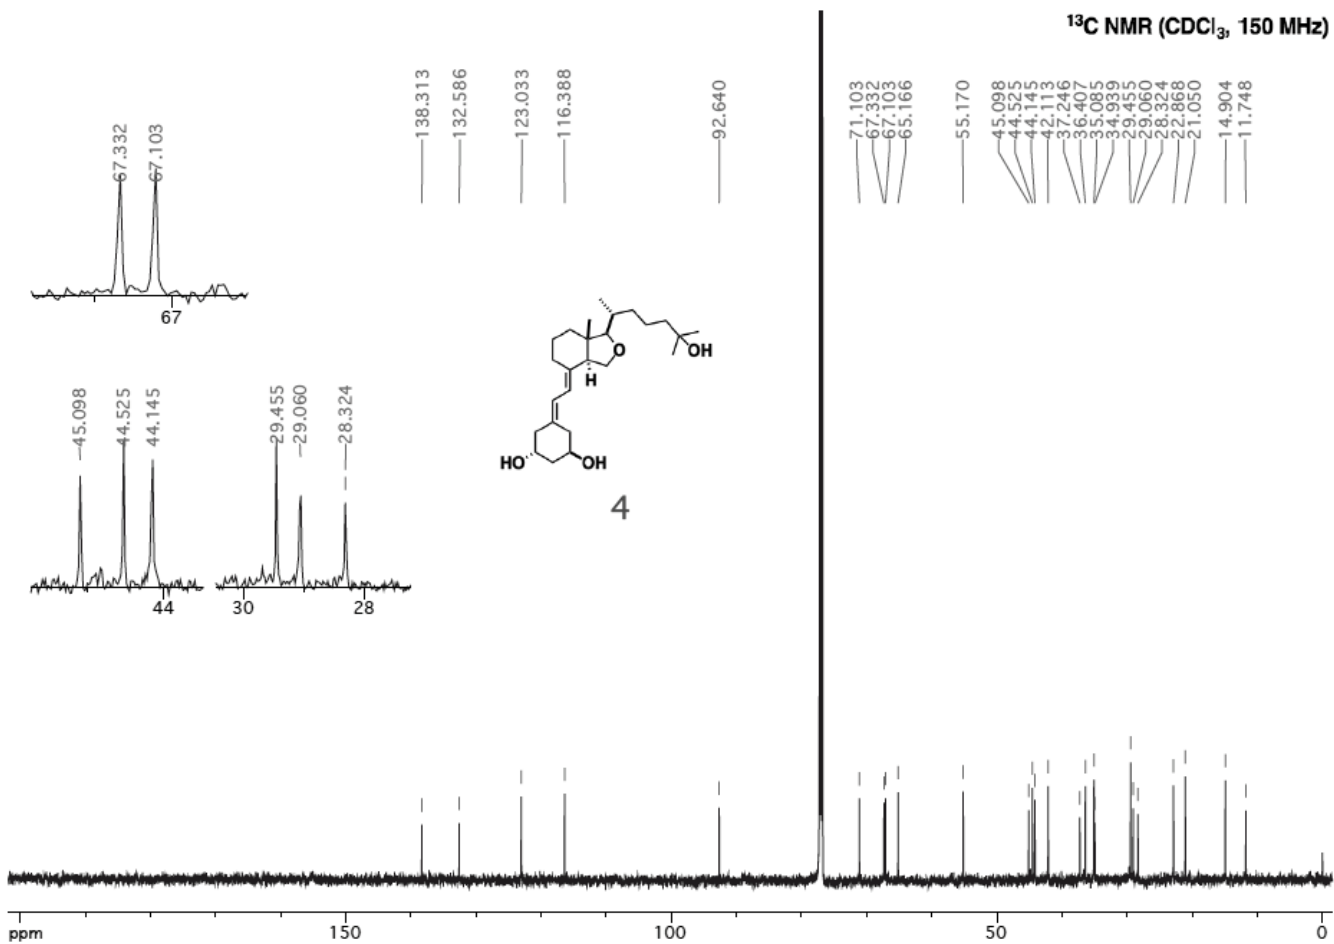

Supplement: c9ob02339a1.pdf [file c9ob02339a1.pdf]
